# Supplementary material for: The Synthesis, Crystal Structure, Modification, and Cytotoxic Activity of α-Hydroxy-Alkylphosphonates
Source: MDPI journal article supplement (doi:10.3390/molecules30020428), 2025-01-20

# Supplementary Materials

## The Synthesis, Crystal Structure, Modification, and Cytotoxic Activity of $\alpha$ -Hydroxy-Alkylphosphonates

Zsuzsanna Szalai,<sup>1</sup> Anna Sára Kis,<sup>1</sup> Angéla Takács,<sup>2</sup> László Kőhidai,<sup>2</sup> Konstantin Karaghiosoff,<sup>3</sup> Mátyás Czugler,<sup>1</sup> László Drahos,<sup>4</sup> György Keglevich<sup>1\*</sup>

<sup>1</sup> Department of Organic Chemistry and Technology, Faculty of Chemical Technology and Biotechnology, Budapest University of Technology and Economics, 1111 Budapest, Műegyetem rkp. 3., Hungary; [szalai.zsuzsanna@edu.bme.hu](mailto:szalai.zsuzsanna@edu.bme.hu); [kisannasari@gmail.com](mailto:kisannasari@gmail.com); [czuglerm-pu@gmail.hu](mailto:czuglerm-pu@gmail.hu); [keglevich.gyorgy@vbk.bme.hu](mailto:keglevich.gyorgy@vbk.bme.hu)\*

<sup>2</sup> Department of Genetics, Cell-and Immunobiology, Semmelweis University, Nagyvárad tér 4, 1089 Budapest, Hungary; [takacs.angela@semmelweis.hu](mailto:takacs.angela@semmelweis.hu); [kohidai.laszlo@semmelweis.hu](mailto:kohidai.laszlo@semmelweis.hu)

<sup>3</sup> Department Chemie, Ludwig-Maximilians-Universität München, Butenandtstr. 5-13, D-81377 München, Germany, [klk@cup.uni-muenchen.de](mailto:klk@cup.uni-muenchen.de)

<sup>4</sup> MS Proteomics Research Group, Research Centre for Natural Sciences, 1117 Budapest, Hungary; [drahos.laszlo@ttk.hu](mailto:drahos.laszlo@ttk.hu)

\*Correspondence: [keglevich.gyorgy@vbk.bme.hu](mailto:keglevich.gyorgy@vbk.bme.hu); Tel.: +36-1-463-1111 (ext. 5883)

## Table of Contents

|                                                                                                                                                                                      |     |
|--------------------------------------------------------------------------------------------------------------------------------------------------------------------------------------|-----|
| 1. Principal X-ray geometry data for hydroxyphosphonate <b>2a</b> and hydroxyphosphine oxide <b>2d</b> obtained from the X-ray measurements .....                                    | S2  |
| 2. Spectra for the compounds <b>1b-f</b> , <b>2a-f</b> , <b>3Ab-Db</b> , <b>3Ac</b> , <b>3Ad</b> , <b>4Ab-Cb</b> , <b>4Ac</b> , <b>5</b> , <b>6a</b> and <b>6b</b> synthesized ..... | S11 |

1. Principal X-ray geometry data for hydroxyphosphonate **2a** and hydroxyphosphine oxide **2d** obtained from the X-ray measurements

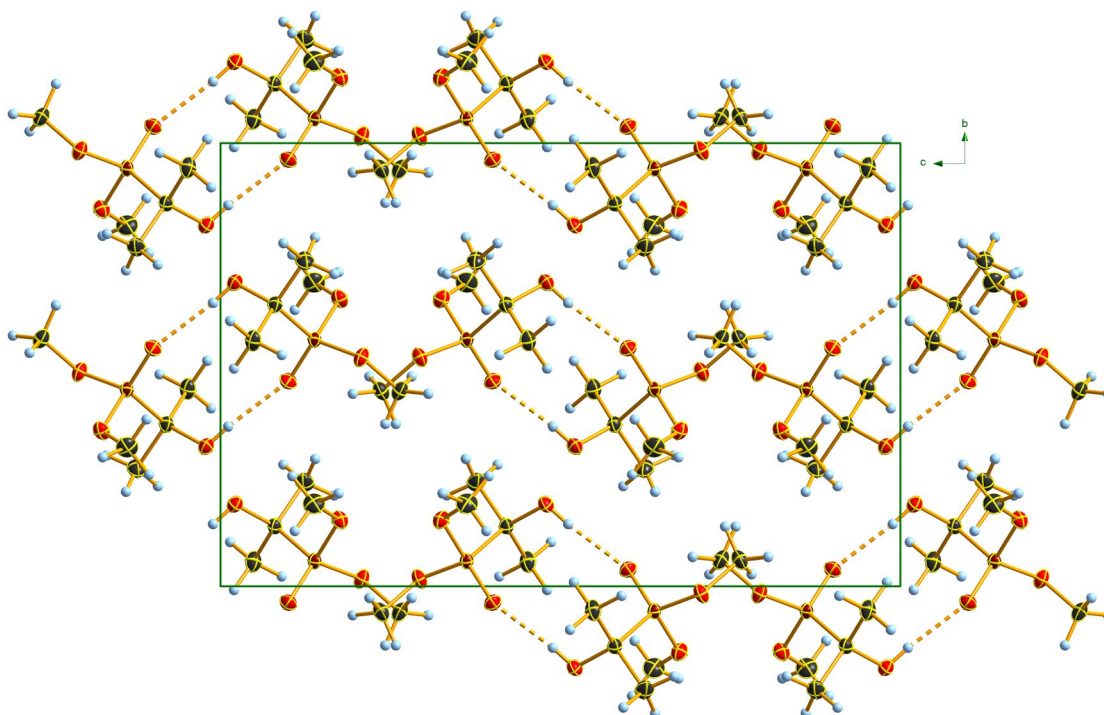

**Figure S1.** Crystal structure of hydroxyphosphonate **2a**; view of the unit cell along the *a*-axis. DIAMOND [50] representation; thermal ellipsoids are drawn at 50% probability level.

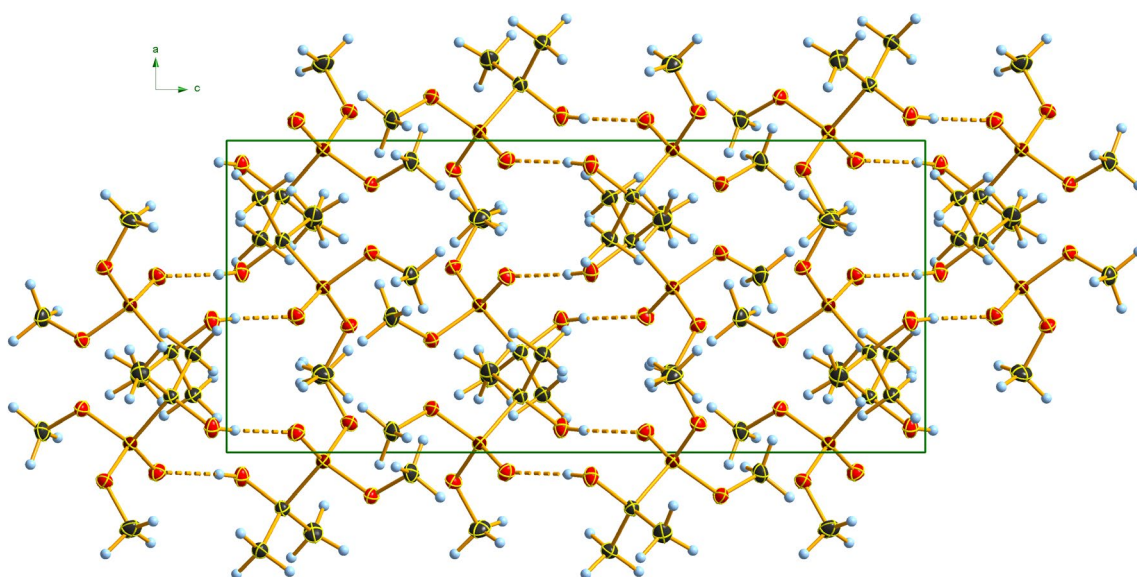

**Figure S2.** Crystal structure of hydroxyphosphonate **2a**; view of the unit cell along the *b*-axis. DIAMOND [50] representation; thermal ellipsoids are drawn at 50% probability level.

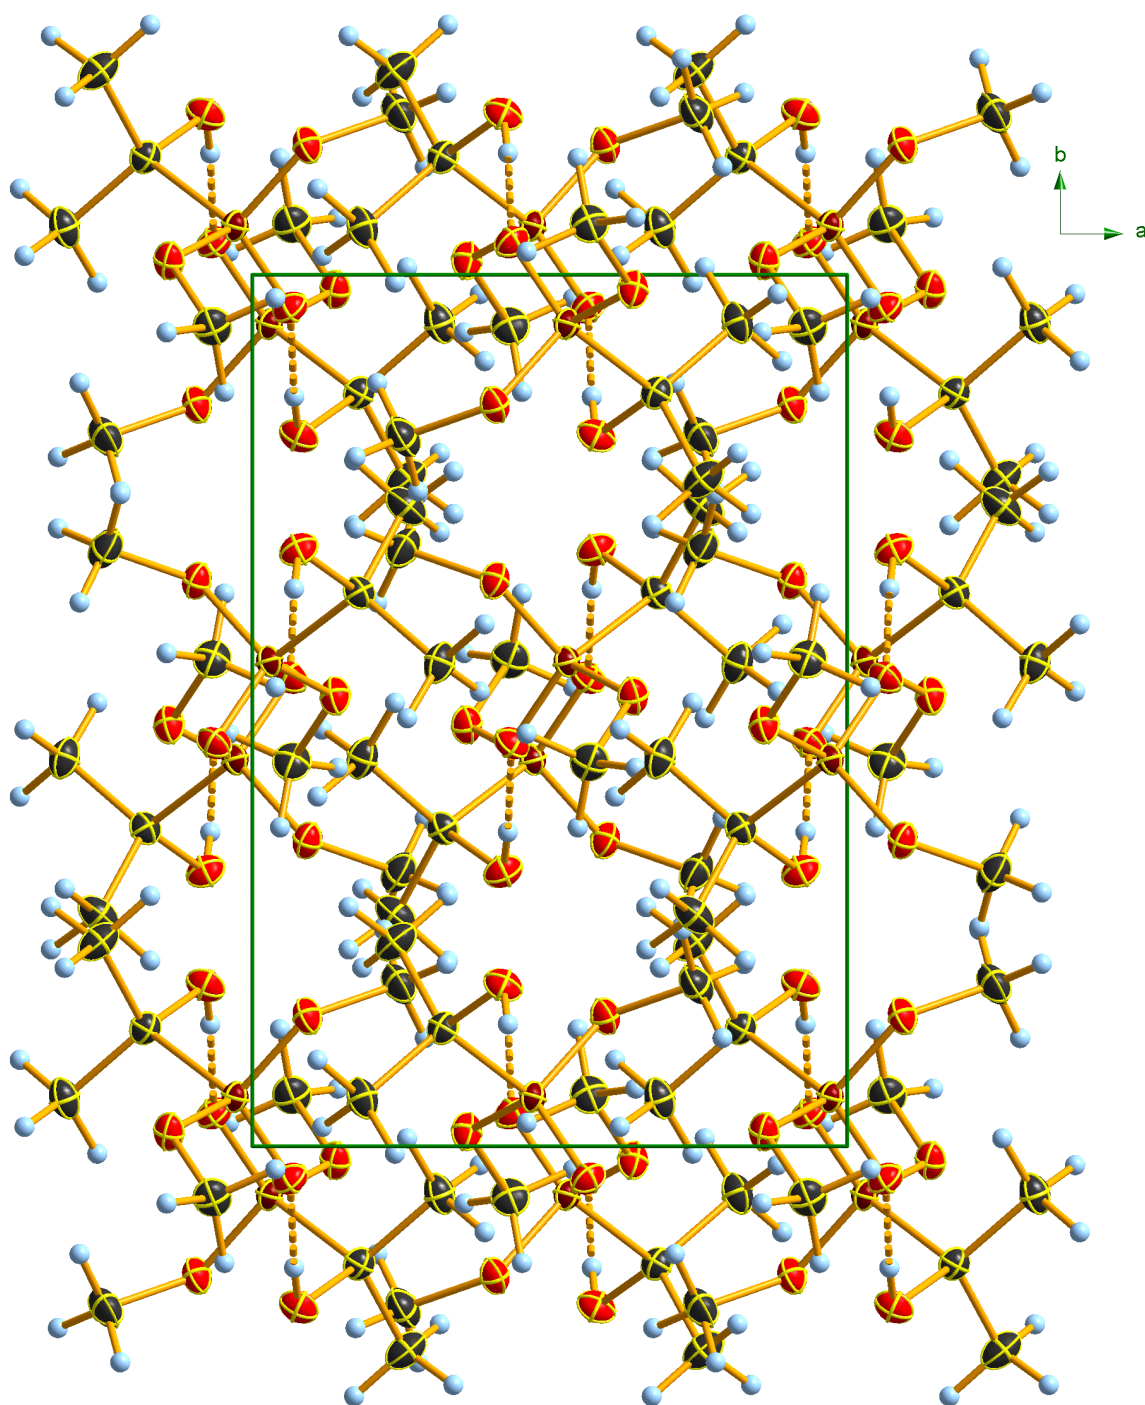

**Figure S3.** Crystal structure of hydroxyphosphonate **2a**; view of the unit cell along the *c*-axis. DIAMOND [50] representation; thermal ellipsoids are drawn at 50% probability level.

**Table S1.** Selected bond lengths (Å) of hydroxyphosphonate **2a**.

|         |          |         |          |
|---------|----------|---------|----------|
| P1 – O2 | 1.476(1) | O3 – C4 | 1.448(1) |
| P1 – O3 | 1.576(1) | O4 – C5 | 1.446(1) |
| P1 – O4 | 1.581(1) | C1 – C3 | 1.520(1) |
| P1 – C1 | 1.824(1) | C1 – C2 | 1.526(1) |
| O1 – C1 | 1.432(1) |         |          |

**Table S2.** Selected bond angles (°) of hydroxyphosphonate **2a**.

|              |          |              |          |
|--------------|----------|--------------|----------|
| O2 – P1 – O3 | 115.0(1) | C5 – O4 – P1 | 121.0(1) |
| O2 – P1 – O4 | 112.9(1) | O1 – C1 – C3 | 107.5(1) |
| O3 – P1 – O4 | 102.2(1) | O1 – C1 – C2 | 111.4(1) |
| O2 – P1 – C1 | 115.3(1) | C3 – C1 – C2 | 111.3(1) |
| O3 – P1 – C1 | 103.0(1) | O1 – C1 – P1 | 104.4(1) |
| O4 – P1 – C1 | 107.1(1) | C3 – C1 – P1 | 110.7(1) |
| C4 – O3 – P1 | 119.6(1) | C2 – C1 – P1 | 111.3(1) |

**Table S3.** Selected torsion angles (°) of hydroxyphosphonate **2a**.

|                   |          |                   |           |
|-------------------|----------|-------------------|-----------|
| O2 – P1 – O3 – C4 | 48.2(1)  | O4 – P1 – C1 – O1 | 65.8(1)   |
| O4 – P1 – O3 – C4 | -74.6(1) | O2 – P1 – C1 – C3 | -176.2(1) |
| C1 – P1 – O3 – C4 | 174.4(1) | O3 – P1 – C1 – C3 | 57.8(1)   |
| O2 – P1 – O4 – C5 | 38.9(1)  | O4 – P1 – C1 – C3 | -49.6(1)  |
| O3 – P1 – O4 – C5 | 163.1(1) | O2 – P1 – C1 – C2 | 59.6(1)   |
| C1 – P1 – O4 – C5 | -89.0(1) | O3 – P1 – C1 – C2 | -66.5(1)  |
| O2 – P1 – C1 – O1 | -60.8(1) | O4 – P1 – C1 – C2 | -173.9(1) |
| O3 – P1 – C1 – O1 | 173.2(1) |                   |           |

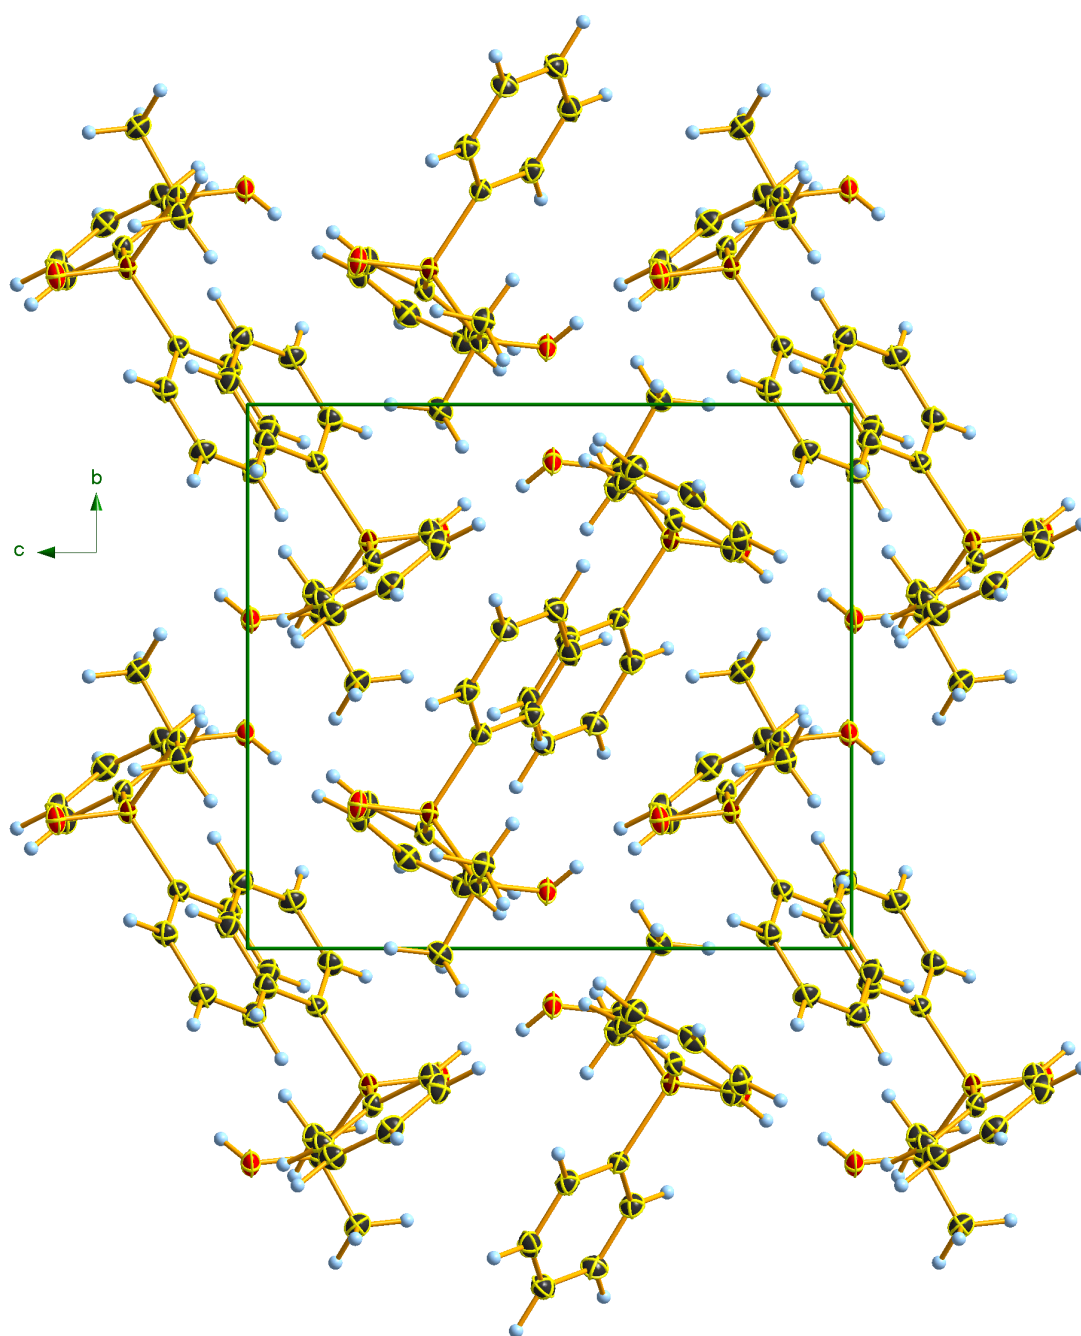

**Figure S4.** Crystal structure of hydroxyphosphine oxide **2d**; view of the unit cell along the  $a$ -axis. DIAMOND [50] representation; thermal ellipsoids are drawn at 50% probability level.

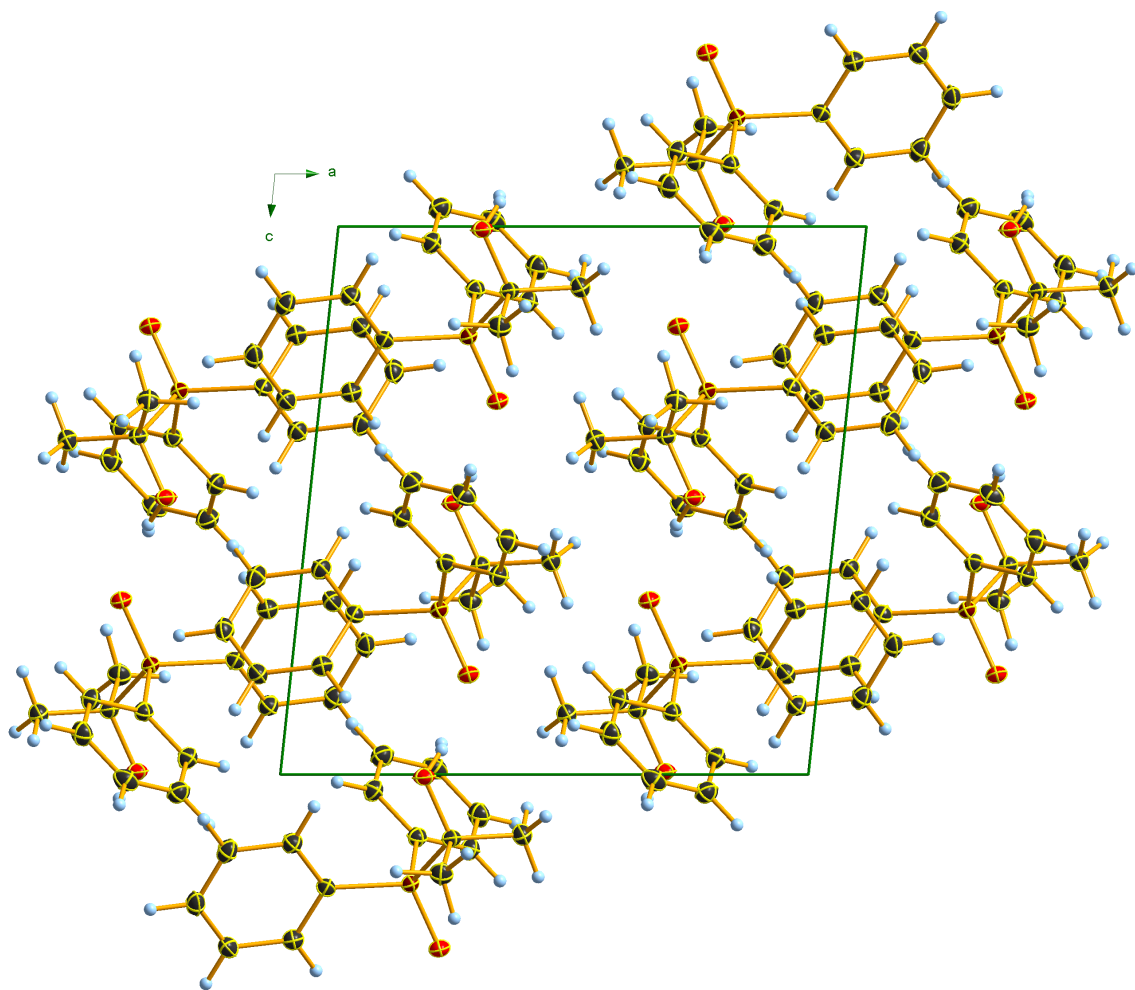

**Figure S5.** Crystal structure of hydroxyphosphine oxide **2d**; view of the unit cell along the *b*-axis. DIAMOND [50] representation; thermal ellipsoids are drawn at 50% probability level.



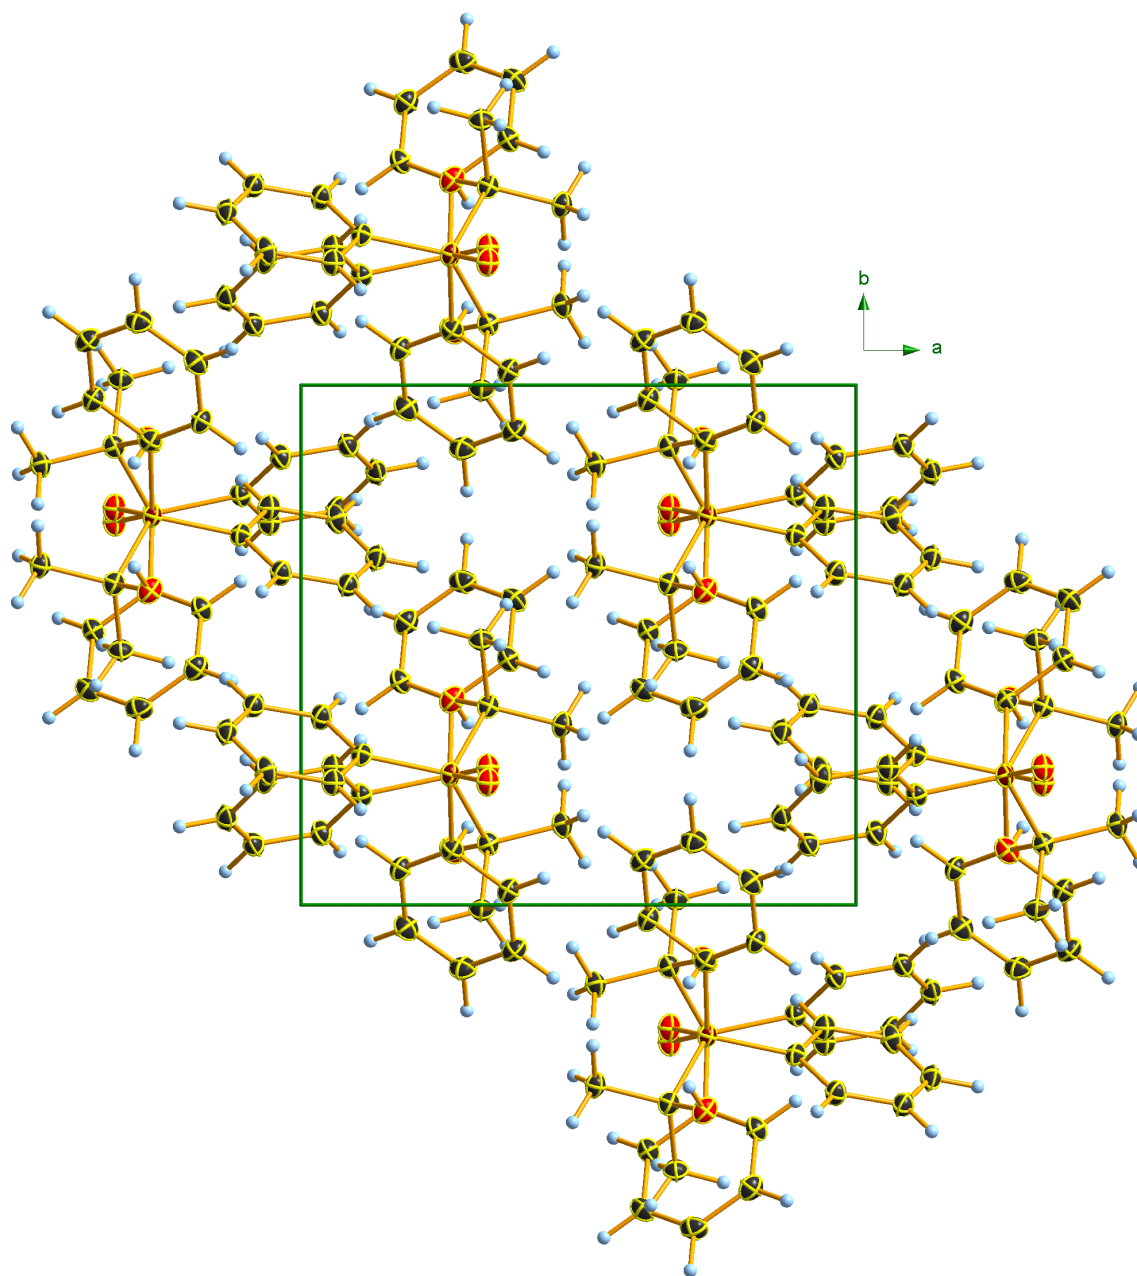

**Figure S6.** Crystal structure of hydroxyphosphine oxide **2d**; view of the unit cell along the *c*-axis. DIAMOND [50] representation; thermal ellipsoids are drawn at 50% probability level.



**Figure S7.** Crystal structure of hydroxyphosphine oxide **2d**; view of the unit cell along the *c*-axis. DIAMOND [50] representation; thermal ellipsoids are drawn at 50% probability level.



**Table S4.** Selected bond lengths (Å) of hydroxyphosphine oxide **2d**.

|          |          |           |          |
|----------|----------|-----------|----------|
| P1 – O1  | 1.499(1) | C14 – C15 | 1.389(2) |
| P1 – C10 | 1.803(1) | C14 – C13 | 1.389(2) |
| P1 – C4  | 1.808(1) | C11 – C12 | 1.391(2) |
| P1 – C1  | 1.858(1) | C9 – C8   | 1.389(2) |
| O2 – C1  | 1.425(1) | C12 – C13 | 1.392(2) |
| C1 – C2  | 1.526(2) | C8 – C7   | 1.387(2) |
| C1 – C3  | 1.528(2) | C6 – C5   | 1.393(2) |
| C4 – C9  | 1.398(2) | C10 – C11 | 1.395(2) |
| C4 – C5  | 1.400(2) | C10 – C15 | 1.398(2) |
| C6 – C7  | 1.389(2) |           |          |

**Table S5.** Selected bond angles (°) of hydroxyphosphine oxide **2d**.

|               |          |                 |          |
|---------------|----------|-----------------|----------|
| O1 – P1 – C10 | 111.6(1) | C14 – C15 – C10 | 120.4(1) |
| O1 – P1 – C4  | 112.5(1) | C12 – C11 – C10 | 120.1(1) |
| C10 – P1 – C4 | 106.0(1) | C8 – C9 – C4    | 120.6(1) |
| O1 – P1 – C1  | 110.4(1) | C11 – C12 – C13 | 120.0(1) |
| C10 – P1 – C1 | 106.8(1) | C14 – C13 – C12 | 120.3(1) |
| C4 – P1 – C1  | 109.4(1) | C7 – C8 – C9    | 120.1(1) |
| O2 – C1 – C2  | 111.6(1) | C8 – C7 – C6    | 120.0(1) |
| O2 – C1 – C3  | 107.4(1) | C6 – C5 – C4    | 120.2(1) |
| C2 – C1 – C3  | 111.6(1) | C5 – C4 – P1    | 125.1(1) |
| O2 – C1 – P1  | 110.0(1) | C7 – C6 – C5    | 120.1(1) |
| C2 – C1 – P1  | 107.9(1) | C11 – C10 – C15 | 119.4(1) |
| C3 – C1 – P1  | 108.3(1) | C11 – C10 – P1  | 123.6(1) |
| C9 – C4 – C5  | 119.0(1) | C15 – C10 – P1  | 117.0(1) |
| C9 – C4 – P1  | 115.9(1) | C15 – C14 – C13 | 119.8(1) |

**Table S6.** Selected torsion angles (°) of hydroxyphosphine oxide **2d**.

|                     |           |                       |           |
|---------------------|-----------|-----------------------|-----------|
| O1 – P1 – C1 – O2   | 179.2(1)  | C4 – P1 – C10 – C15   | -152.5(1) |
| C10 – P1 – C1 – O2  | 57.8(1)   | C1 – P1 – C10 – C15   | 91.0(1)   |
| C4 – P1 – C1 – O2   | -56.5(1)  | C13 – C14 – C15 – C10 | -0.1(2)   |
| O1 – P1 – C1 – C2   | 57.3(1)   | C11 – C10 – C15 – C14 | 0.4(2)    |
| C10 – P1 – C1 – C2  | -64.1(1)  | P1 – C10 – C15 – C14  | -179.8(1) |
| C4 – P1 – C1 – C2   | -178.4(1) | C15 – C10 – C11 – C12 | -0.5(2)   |
| O1 – P1 – C1 – C3   | -63.7(1)  | P1 – C10 – C11 – C12  | 179.7(1)  |
| C10 – P1 – C1 – C3  | 174.9(1)  | C5 – C4 – C9 – C8     | -0.6(2)   |
| C4 – P1 – C1 – C3   | 60.6(1)   | P1 – C4 – C9 – C8     | 179.8(1)  |
| O1 – P1 – C4 – C9   | -30.7(1)  | C10 – C11 – C12 – C13 | 0.3(2)    |
| C10 – P1 – C4 – C9  | 91.5(1)   | C15 – C14 – C13 – C12 | -0.2(2)   |
| C1 – P1 – C4 – C9   | -153.7(1) | C11 – C12 – C13 – C14 | 0.0(2)    |
| O1 – P1 – C4 – C5   | 149.7(1)  | C4 – C9 – C8 – C7     | -0.4(2)   |
| C10 – P1 – C4 – C5  | -88.1(1)  | C9 – C8 – C7 – C6     | 1.3(2)    |
| C1 – P1 – C4 – C5   | 26.7(1)   | C5 – C6 – C7 – C8     | -1.1(2)   |
| O1 – P1 – C10 – C11 | 150.1(1)  | C7 – C6 – C5 – C4     | 0.1(2)    |
| C4 – P1 – C10 – C11 | 27.3(1)   | C9 – C4 – C5 – C6     | 0.8(2)    |
| C1 – P1 – C10 – C11 | -89.3(1)  | P1 – C4 – C5 – C6     | -179.7(1) |
| O1 – P1 – C10 – C15 | -29.7(1)  |                       |           |

2. Spectra for the compounds 1b-f, 2a-f, 3Ab-Db, 3Ac, 3Ad, 4Ab-Cb, 4Ac, 5, 6a and 6b synthesized

$^{31}\text{P}$   $\{^1\text{H}\}$  NMR (122 MHz,  $\text{CDCl}_3$ ) spectra for 1b

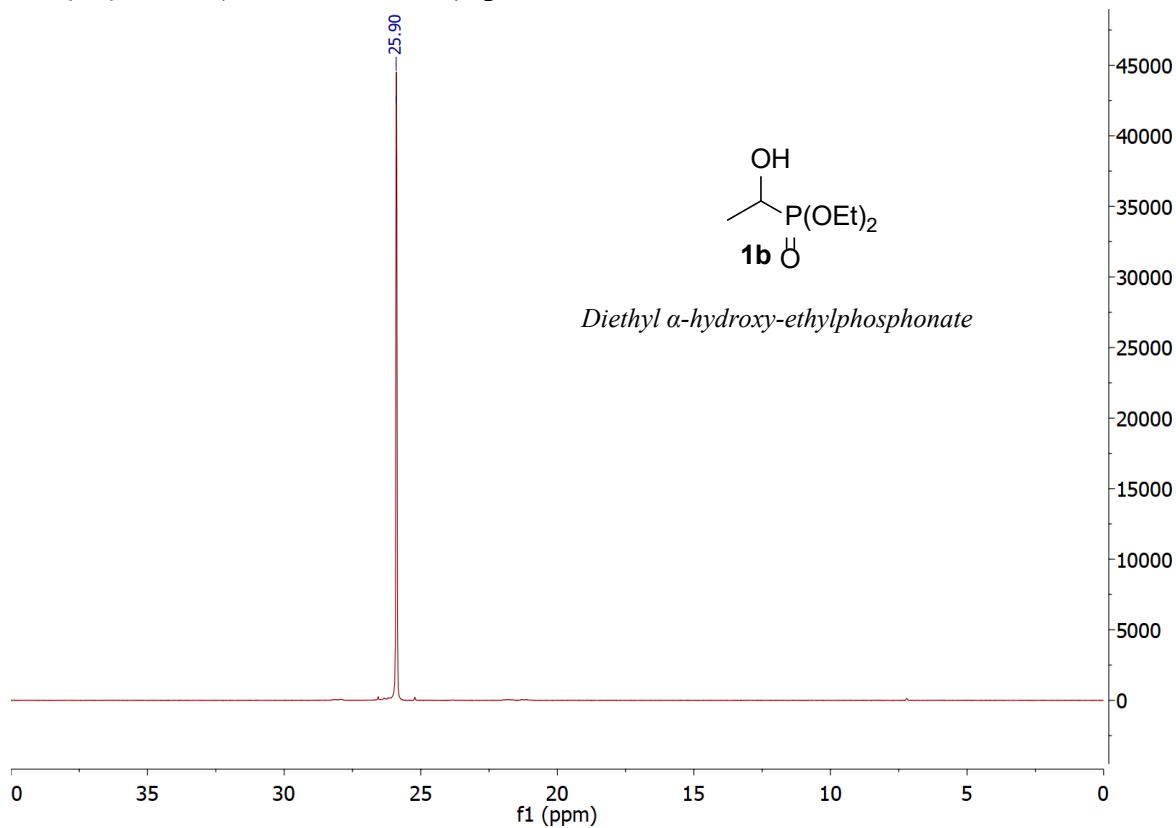

$^{31}\text{P}$   $\{^1\text{H}\}$  NMR (202 MHz,  $\text{CDCl}_3$ ) spectra for 1c

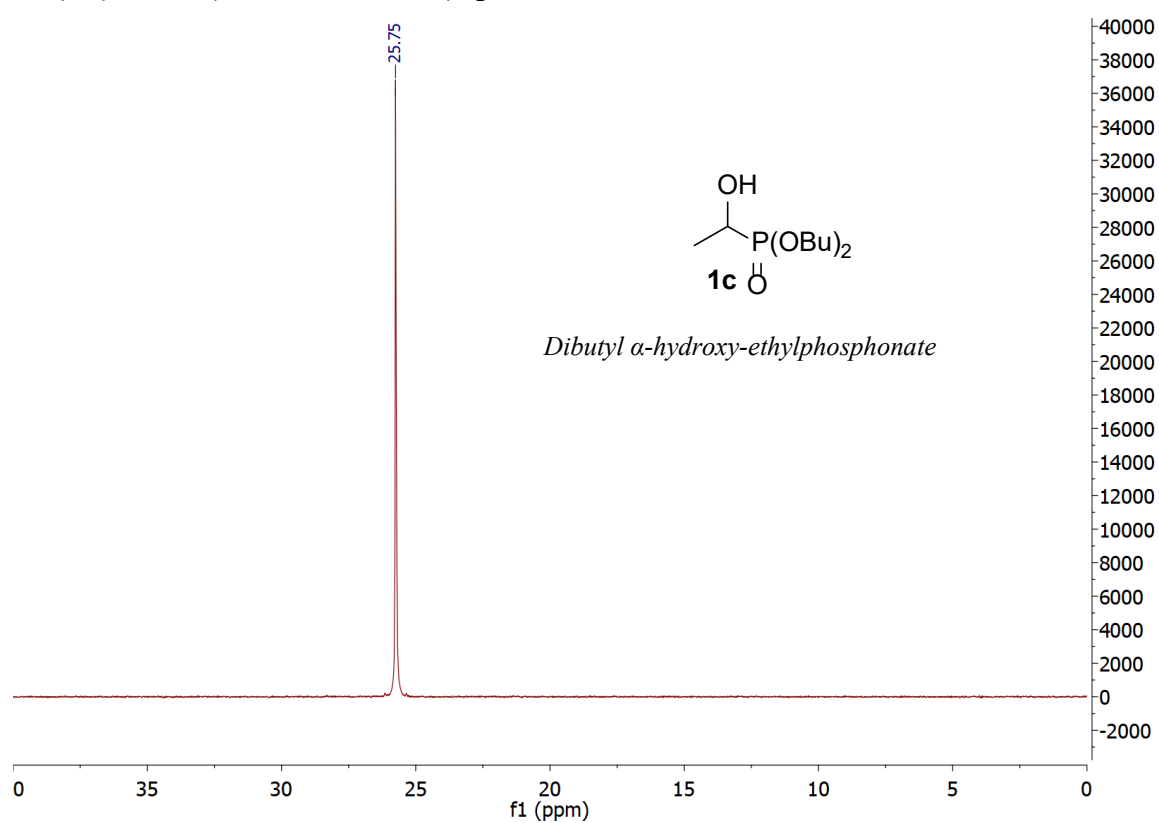

**$^{31}\text{P}$  { $^1\text{H}$ } NMR (202 MHz,  $\text{CDCl}_3$ ) spectra for 1d**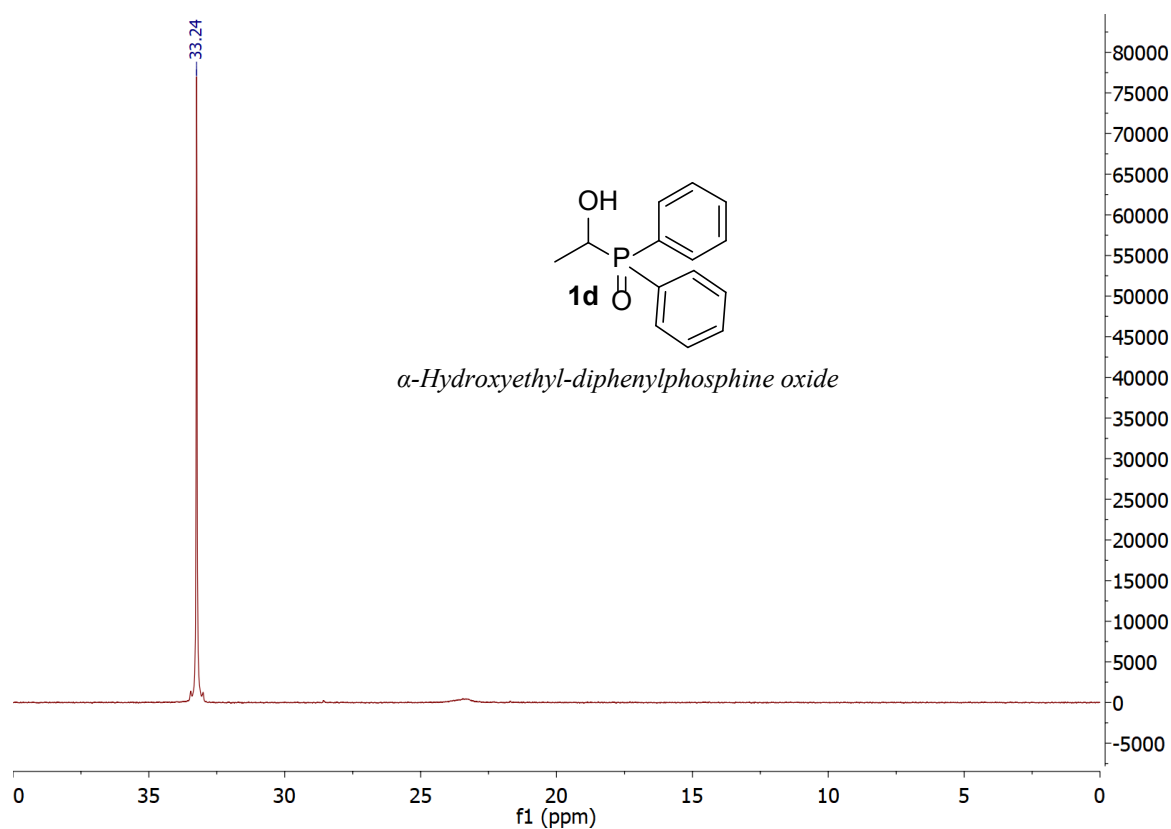 **$^{31}\text{P}$  { $^1\text{H}$ } NMR (202 MHz,  $\text{CDCl}_3$ ) spectra for 1e**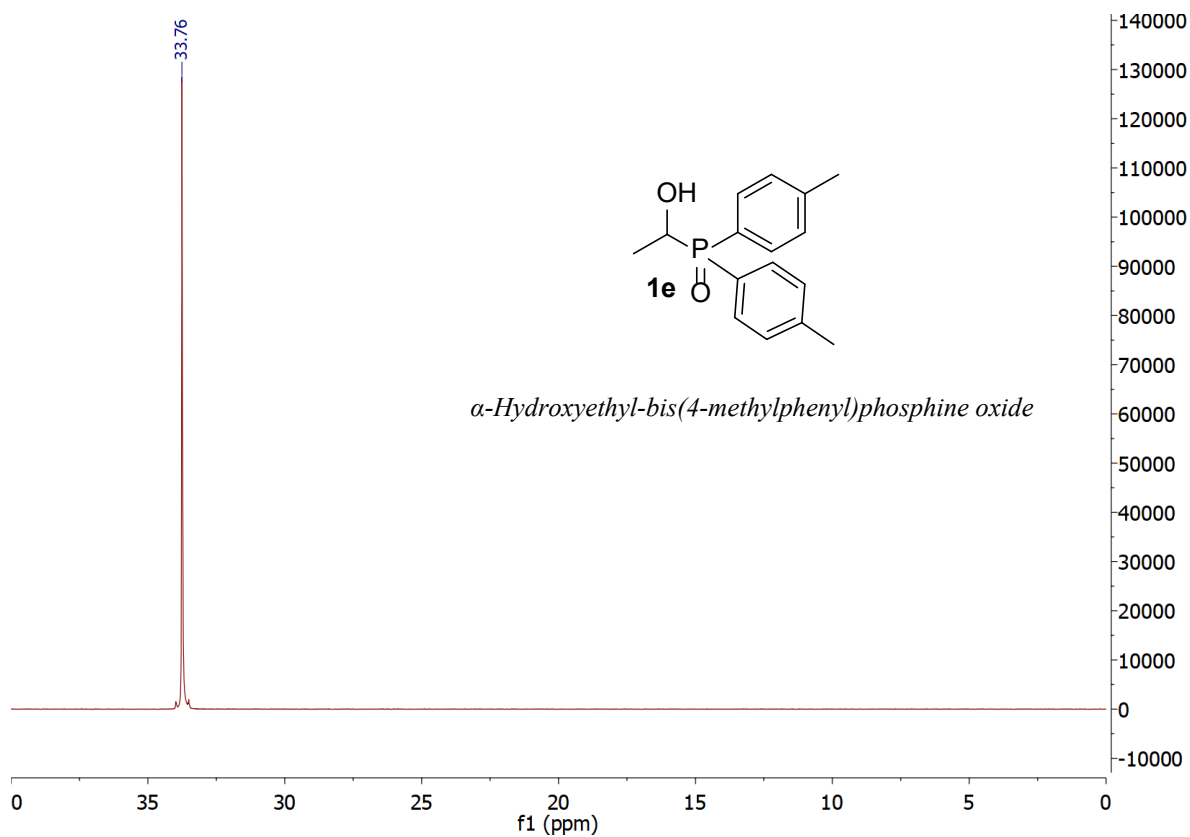

**$^{31}\text{P}$  { $^1\text{H}$ } NMR (202 MHz,  $\text{CDCl}_3$ ) spectra for 1f**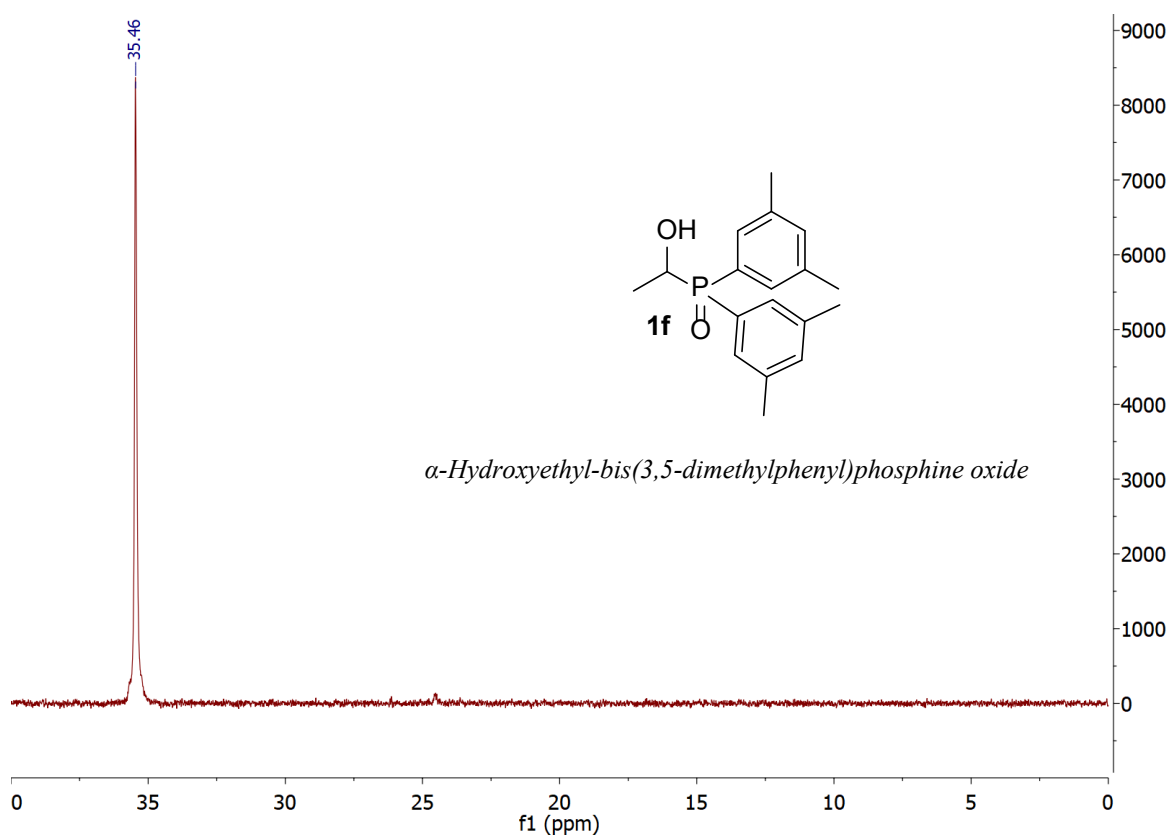 **$^{31}\text{P}$  { $^1\text{H}$ } NMR (202 MHz,  $\text{CDCl}_3$ ) spectra for 2a**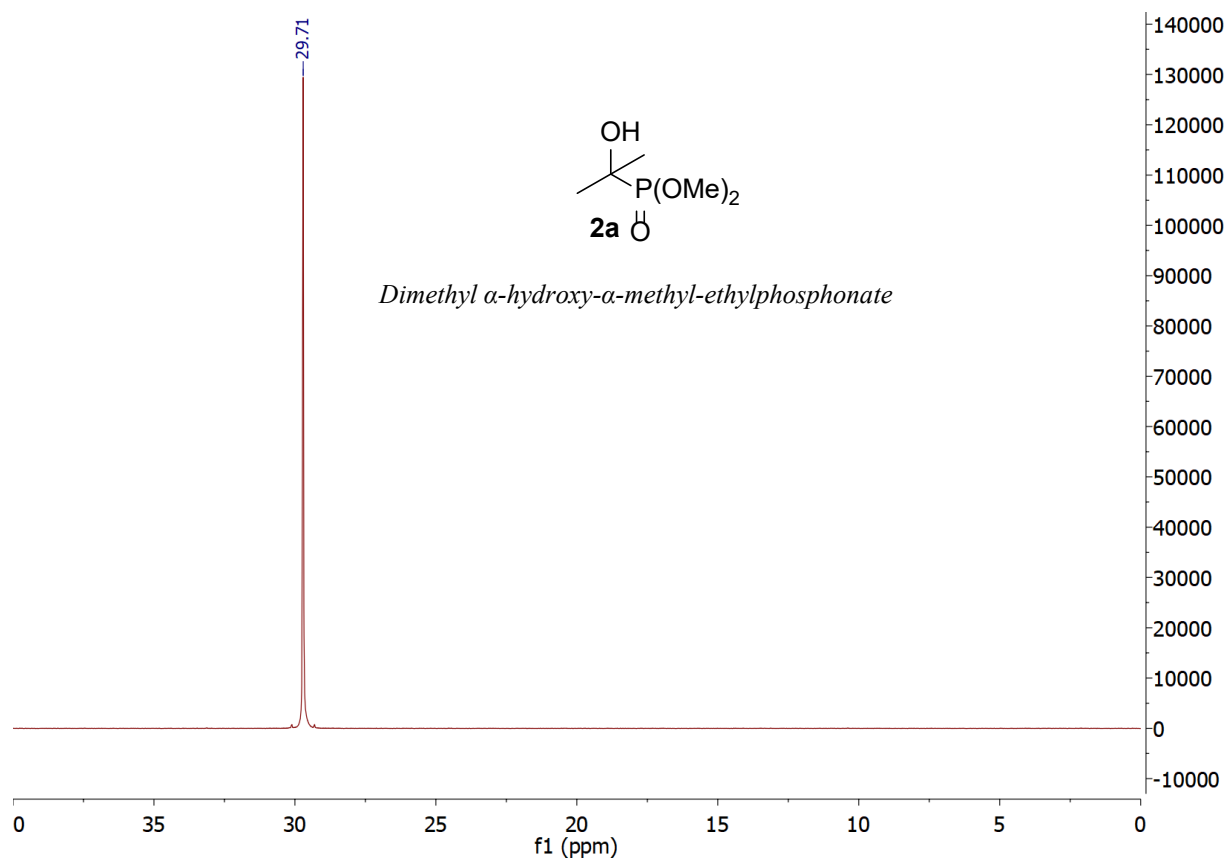



**$^{31}\text{P}$   $\{^1\text{H}\}$  NMR (202 MHz,  $\text{CDCl}_3$ ) spectra for 2b**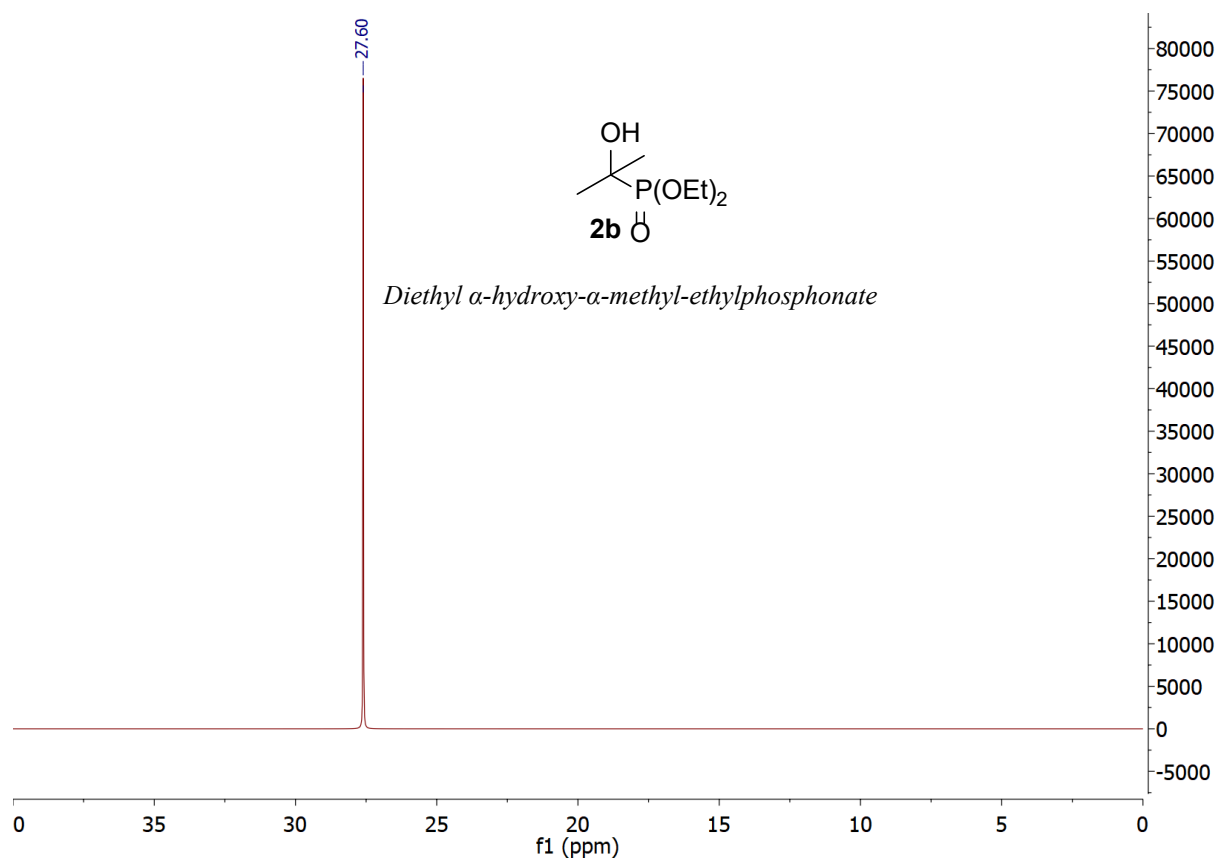 **$^{31}\text{P}$   $\{^1\text{H}\}$  NMR (202 MHz,  $\text{CDCl}_3$ ) spectra for 2c**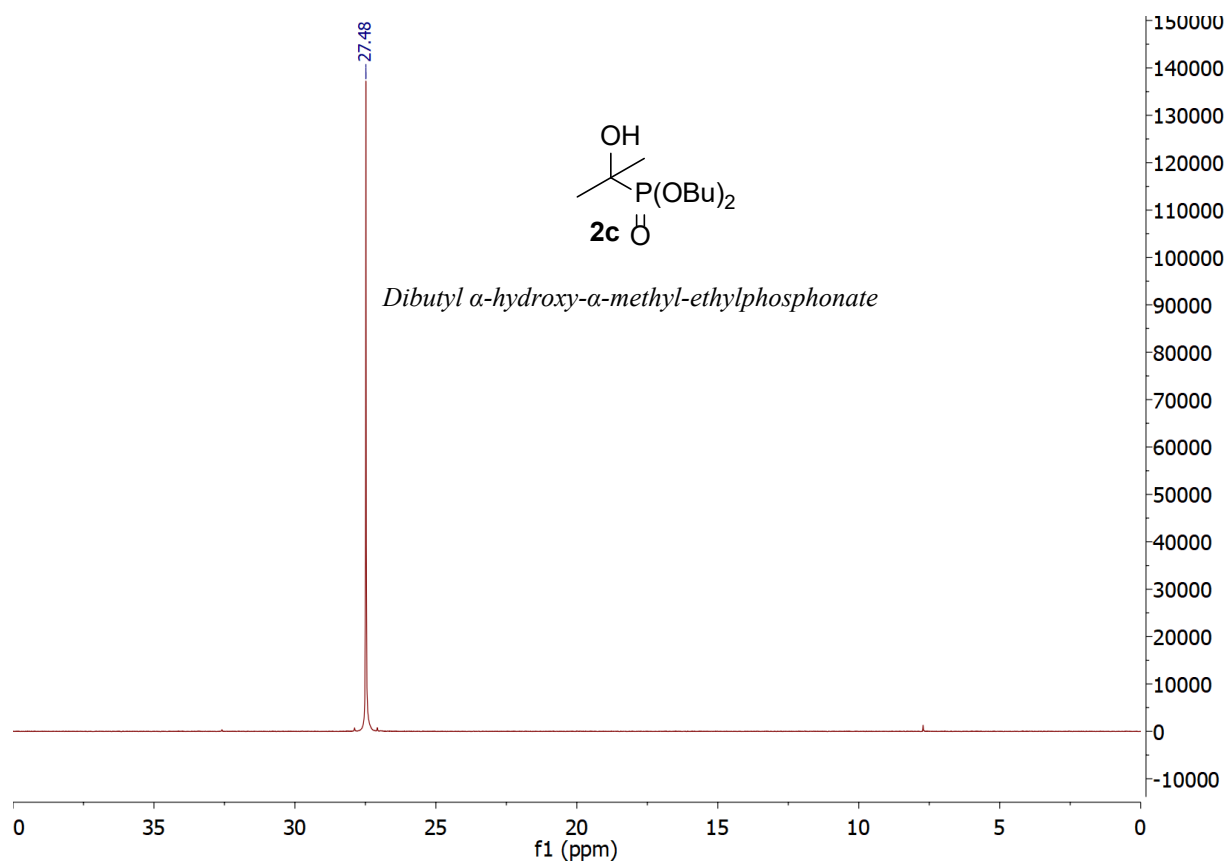

**$^{31}\text{P}$  { $^1\text{H}$ } NMR (202 MHz,  $\text{CDCl}_3$ ) spectra for 2d**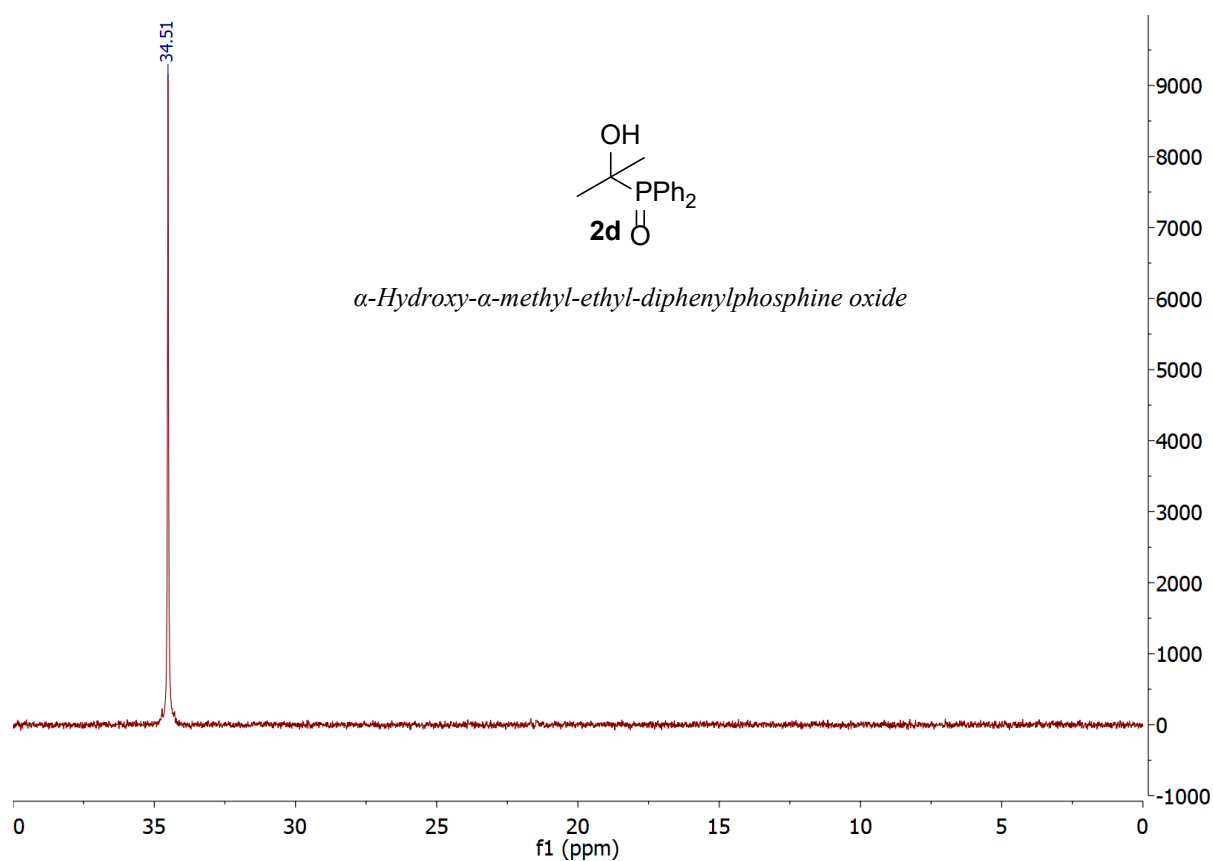 **$^{31}\text{P}$  { $^1\text{H}$ } NMR (202 MHz,  $\text{CDCl}_3$ ) spectra for 2e**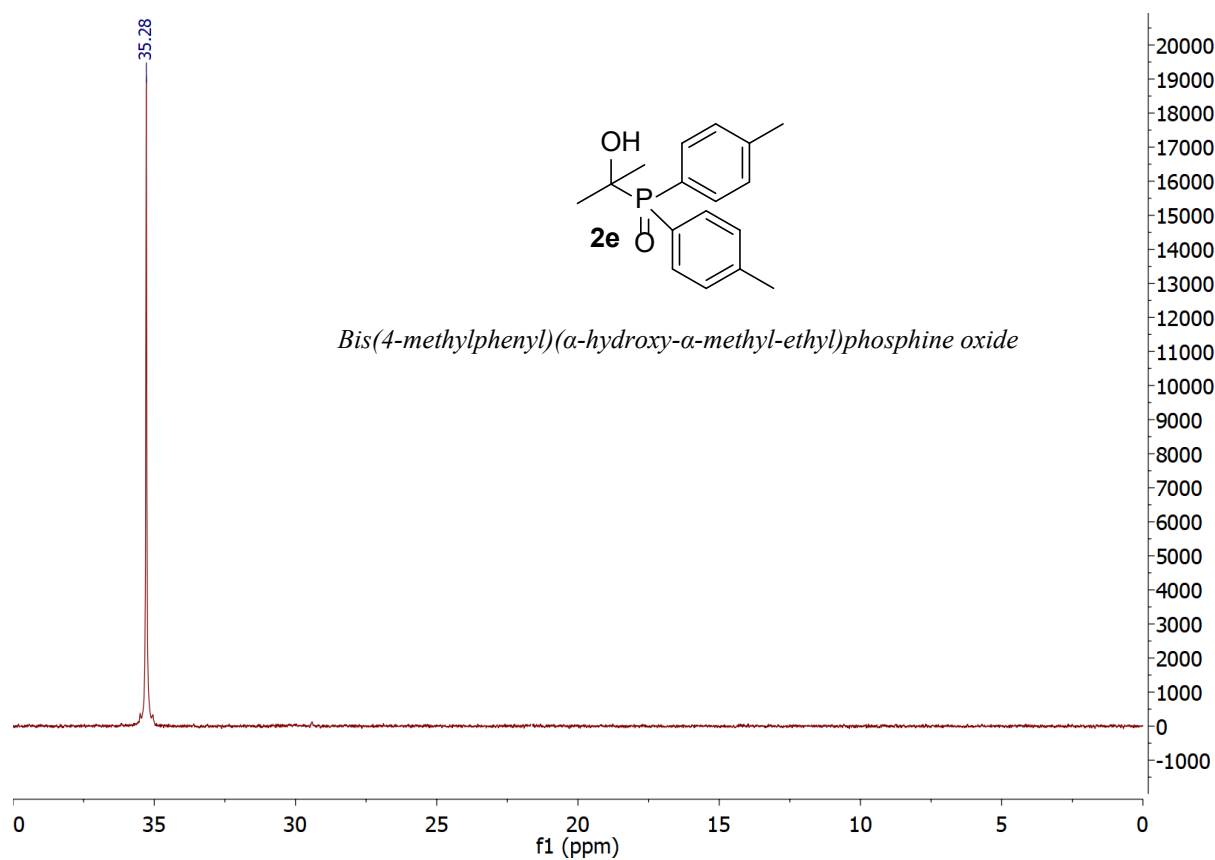

**$^{31}\text{P}$  { $^1\text{H}$ } NMR (202 MHz,  $\text{CDCl}_3$ ) spectra for 2f**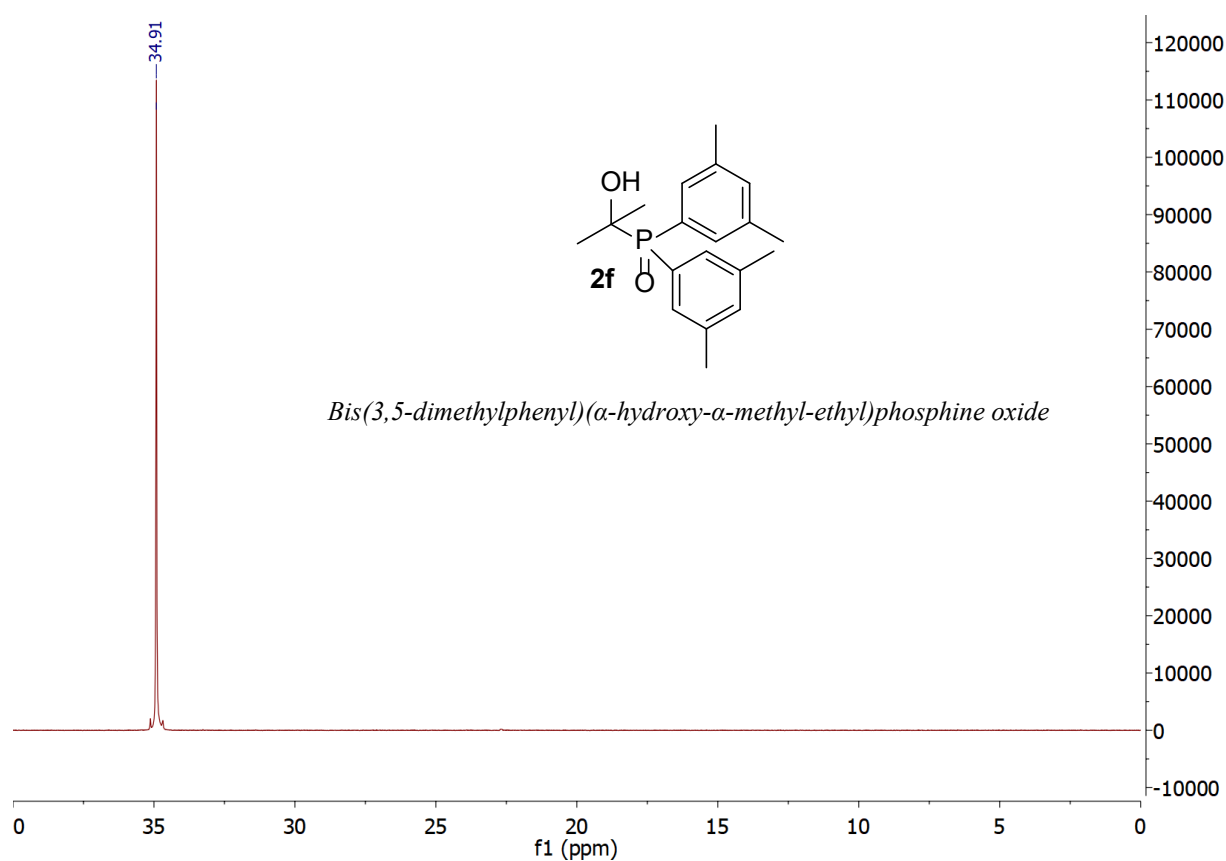 **$^{13}\text{C}$  { $^1\text{H}$ } NMR (126 MHz,  $\text{CDCl}_3$ ) spectra for 2f**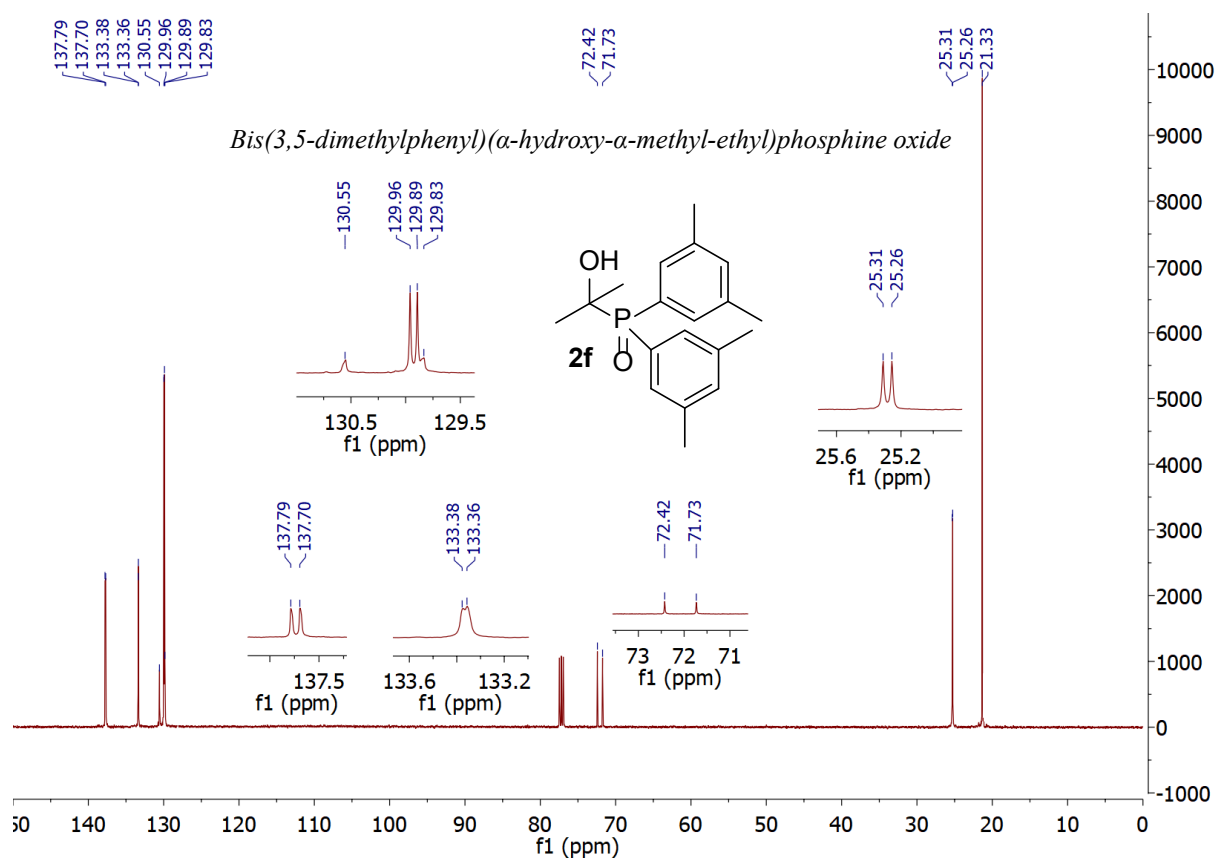

**<sup>1</sup>H NMR (500 MHz, CDCl<sub>3</sub>) spectra for 2f**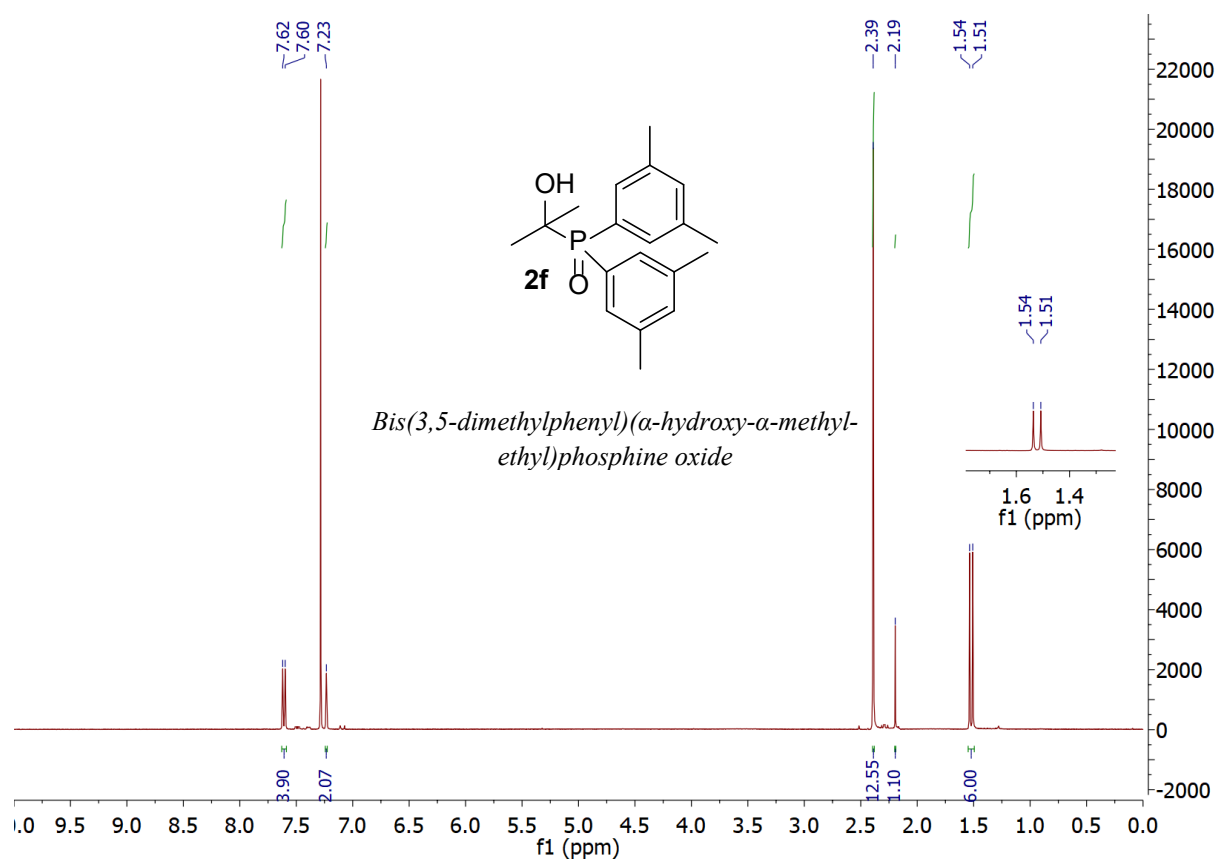**<sup>31</sup>P {<sup>1</sup>H} NMR (202 MHz, CDCl<sub>3</sub>) spectra for 3Ab**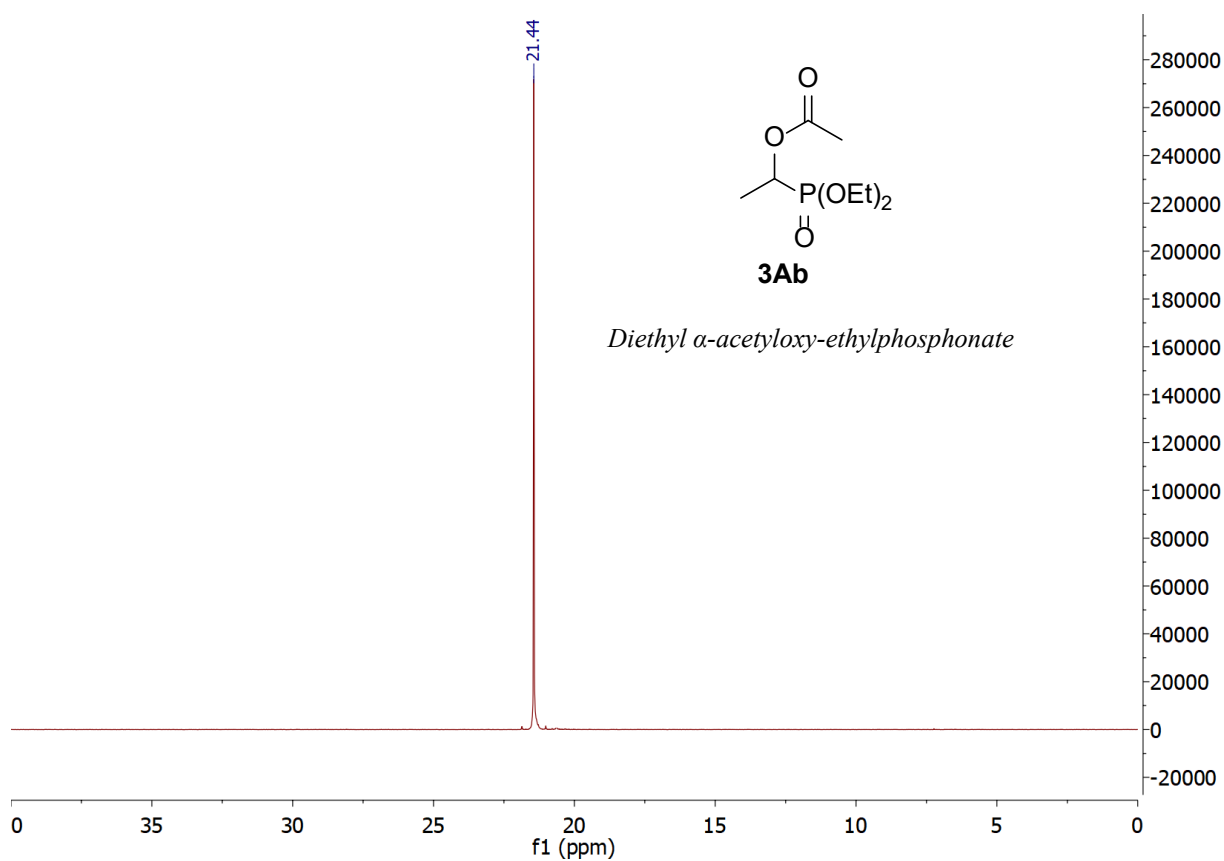

**$^{31}\text{P}$   $\{^1\text{H}\}$  NMR (202 MHz,  $\text{CDCl}_3$ ) spectra for 3Bb**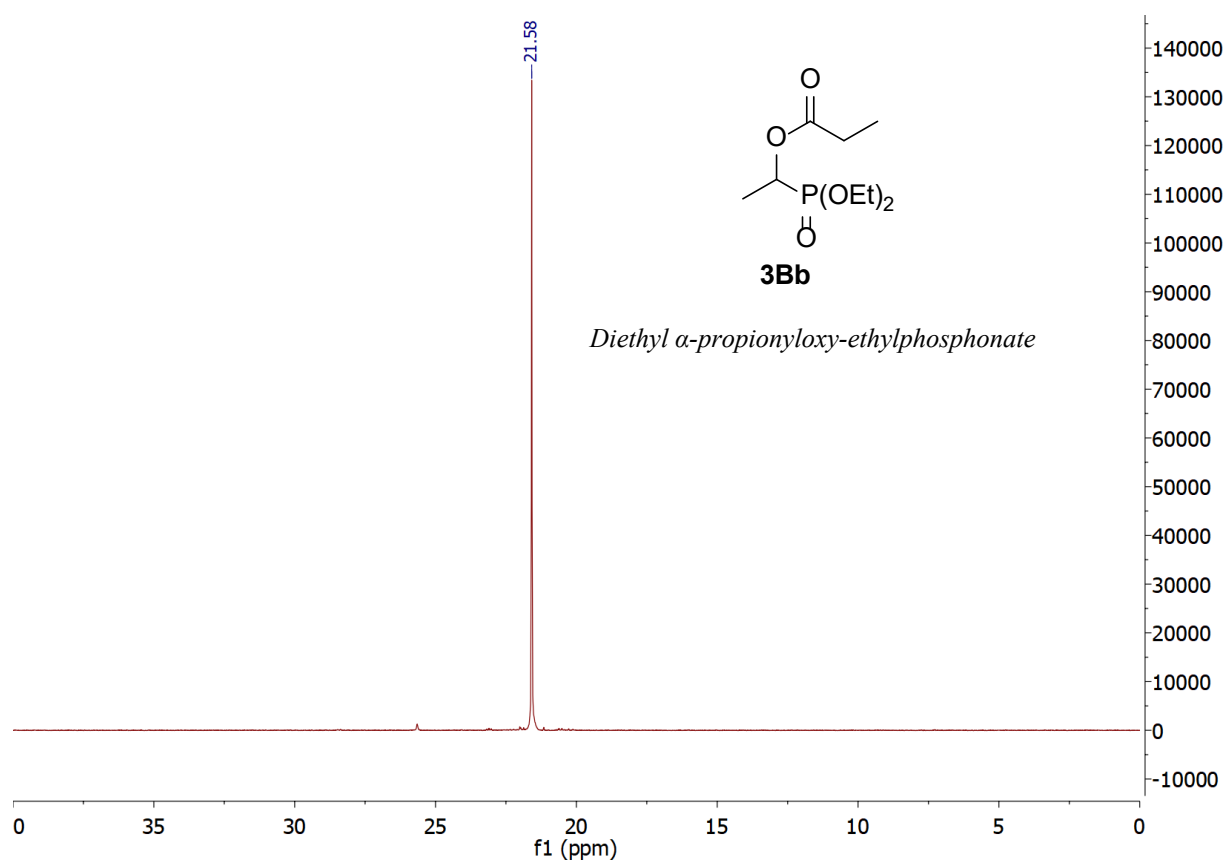 **$^{13}\text{C}$   $\{^1\text{H}\}$  NMR (126 MHz,  $\text{CDCl}_3$ ) spectra for 3Bb**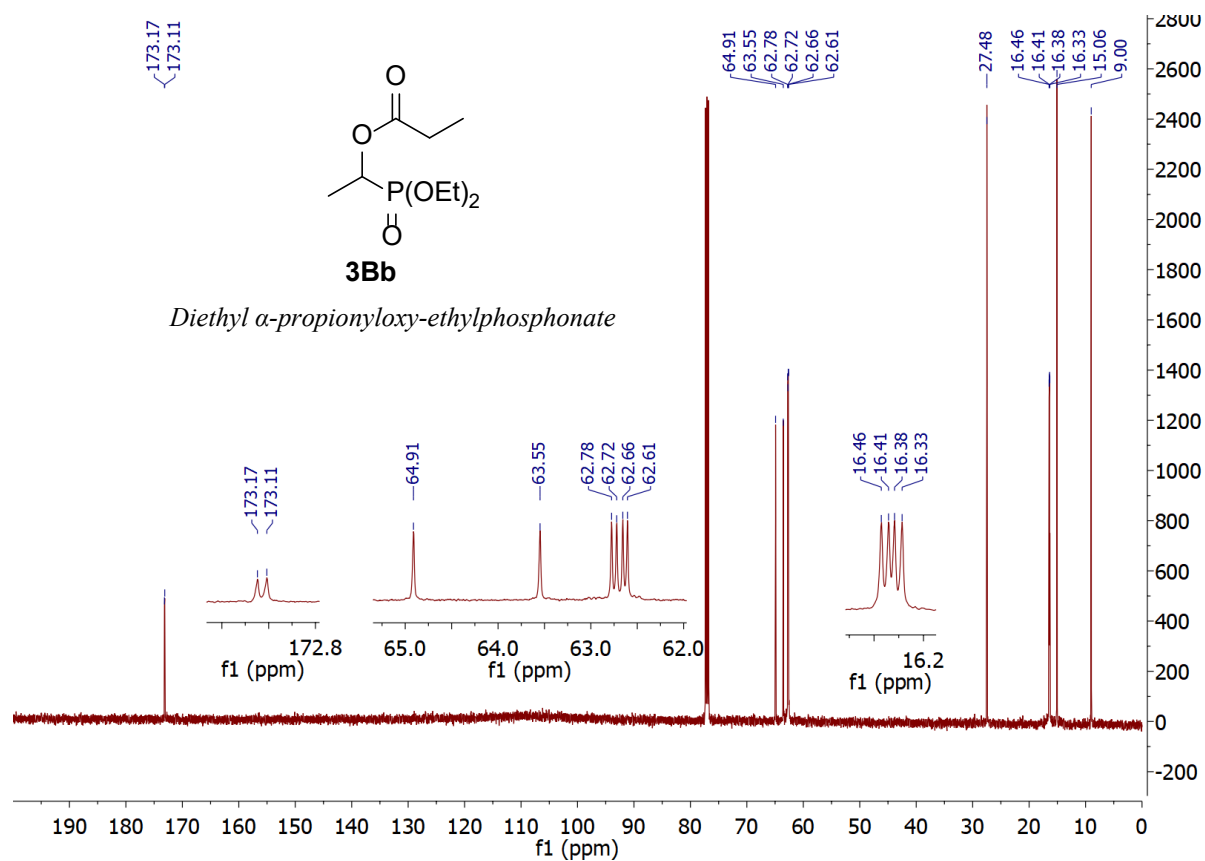



**<sup>1</sup>H NMR (500 MHz, CDCl<sub>3</sub>) spectra for 3Bb**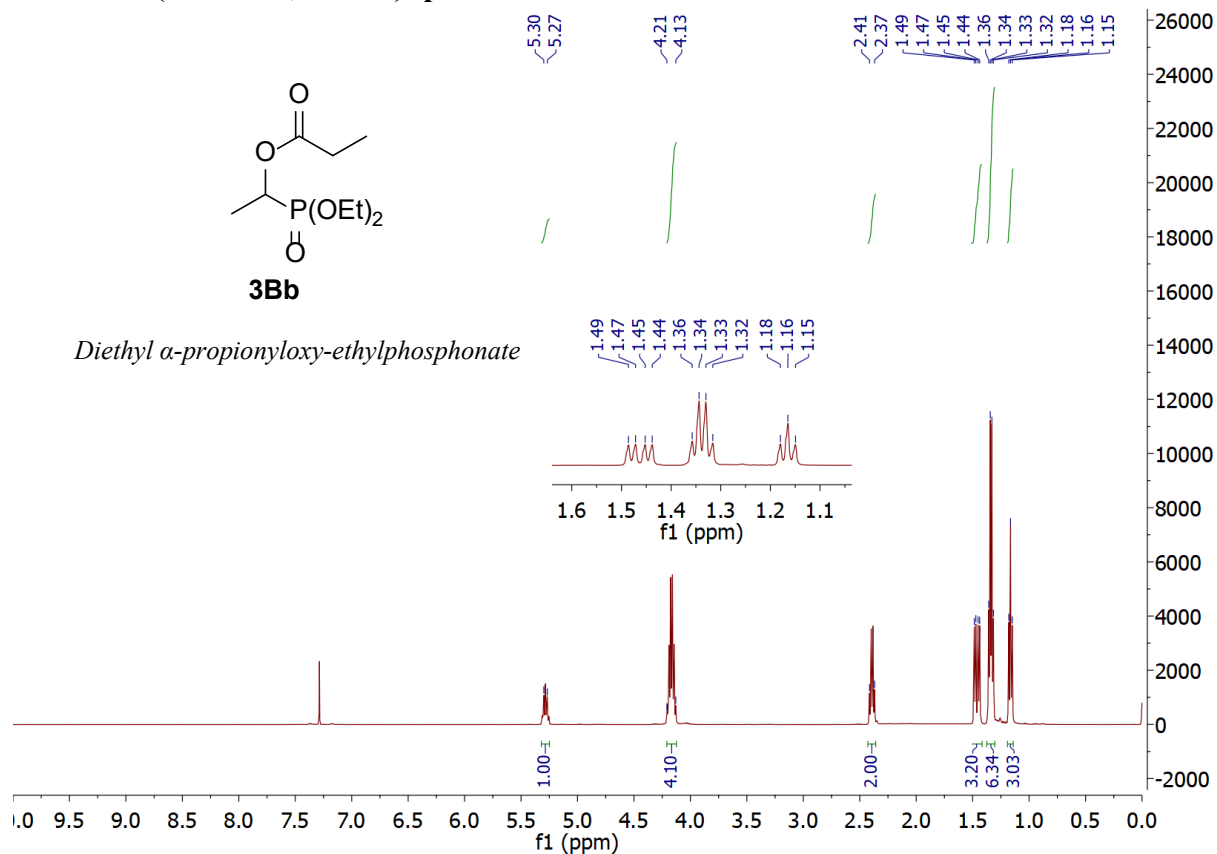**<sup>31</sup>P {<sup>1</sup>H} NMR (202 MHz, CDCl<sub>3</sub>) spectra for 3Cb**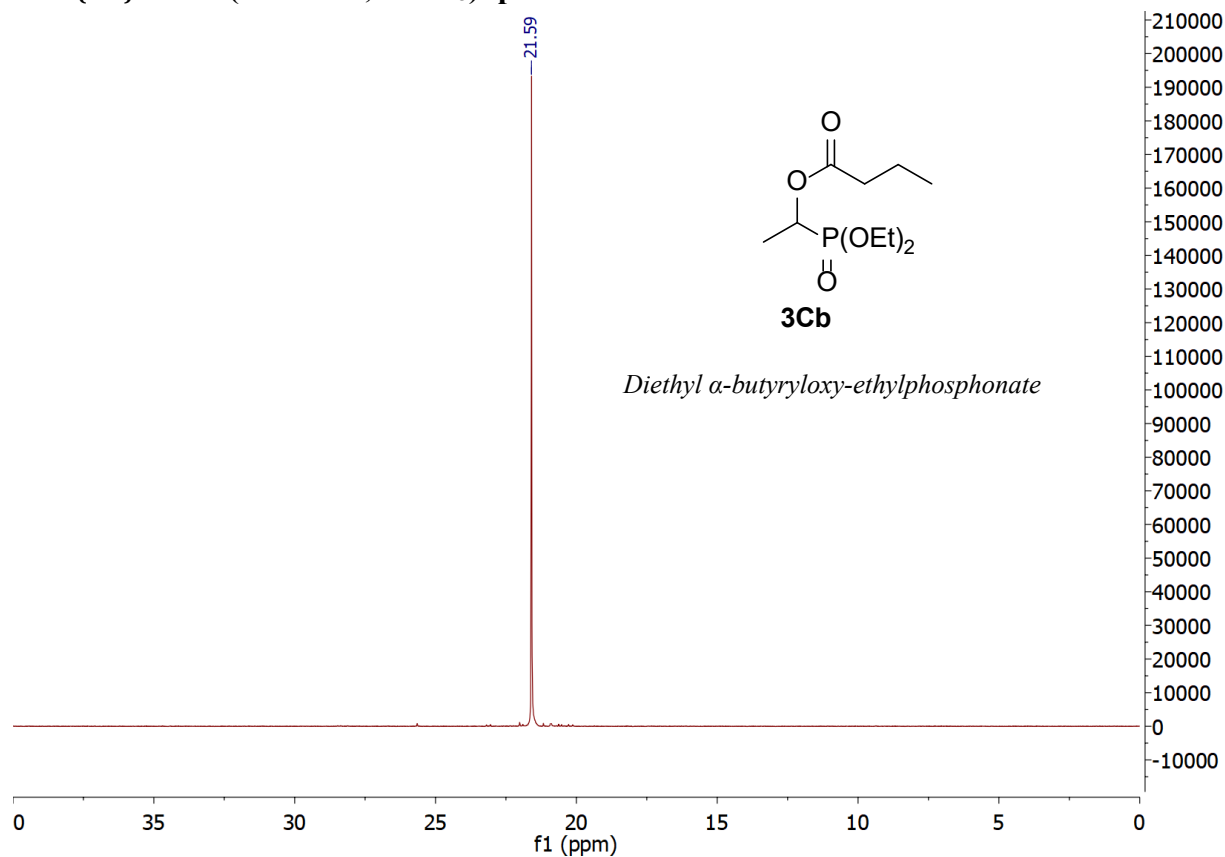

**$^{13}\text{C}$  { $^1\text{H}$ } NMR (126 MHz,  $\text{CDCl}_3$ ) spectra for 3Cb**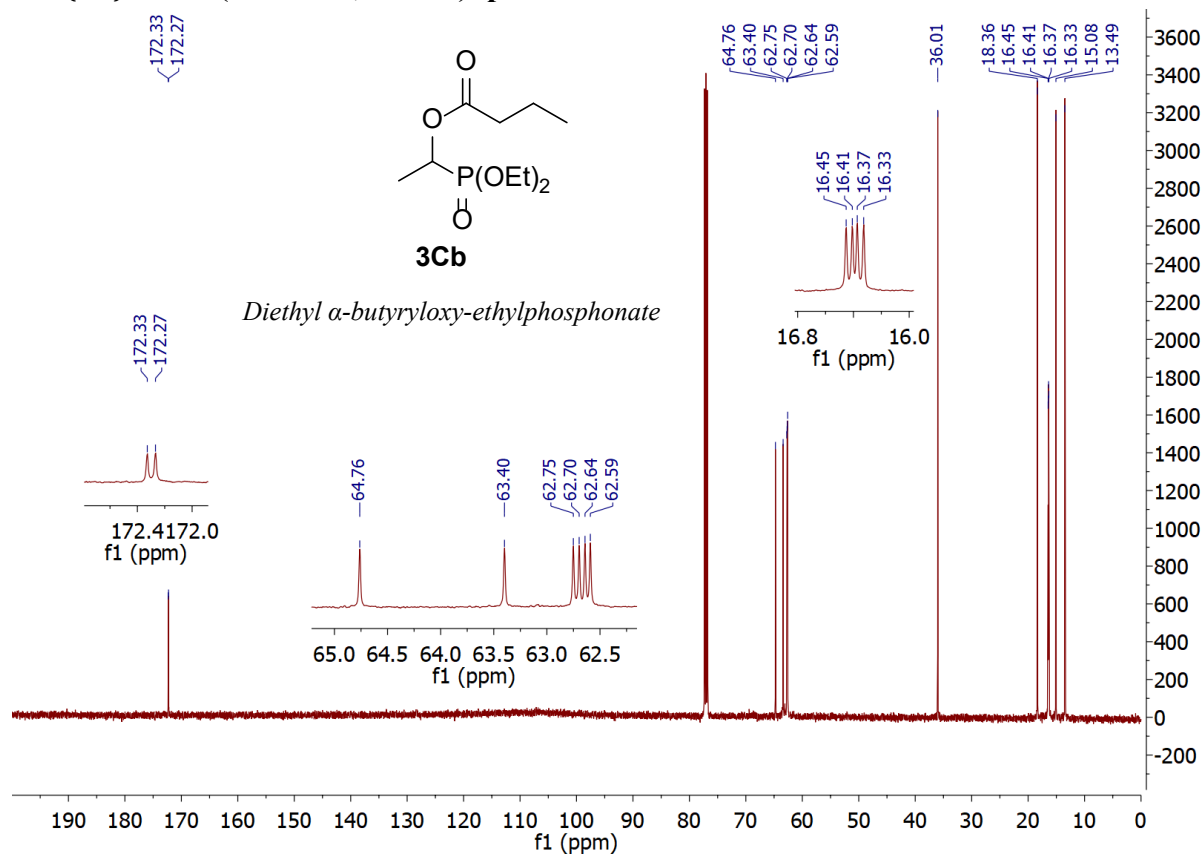 **$^1\text{H}$  NMR (500 MHz,  $\text{CDCl}_3$ ) spectra for 3Cb**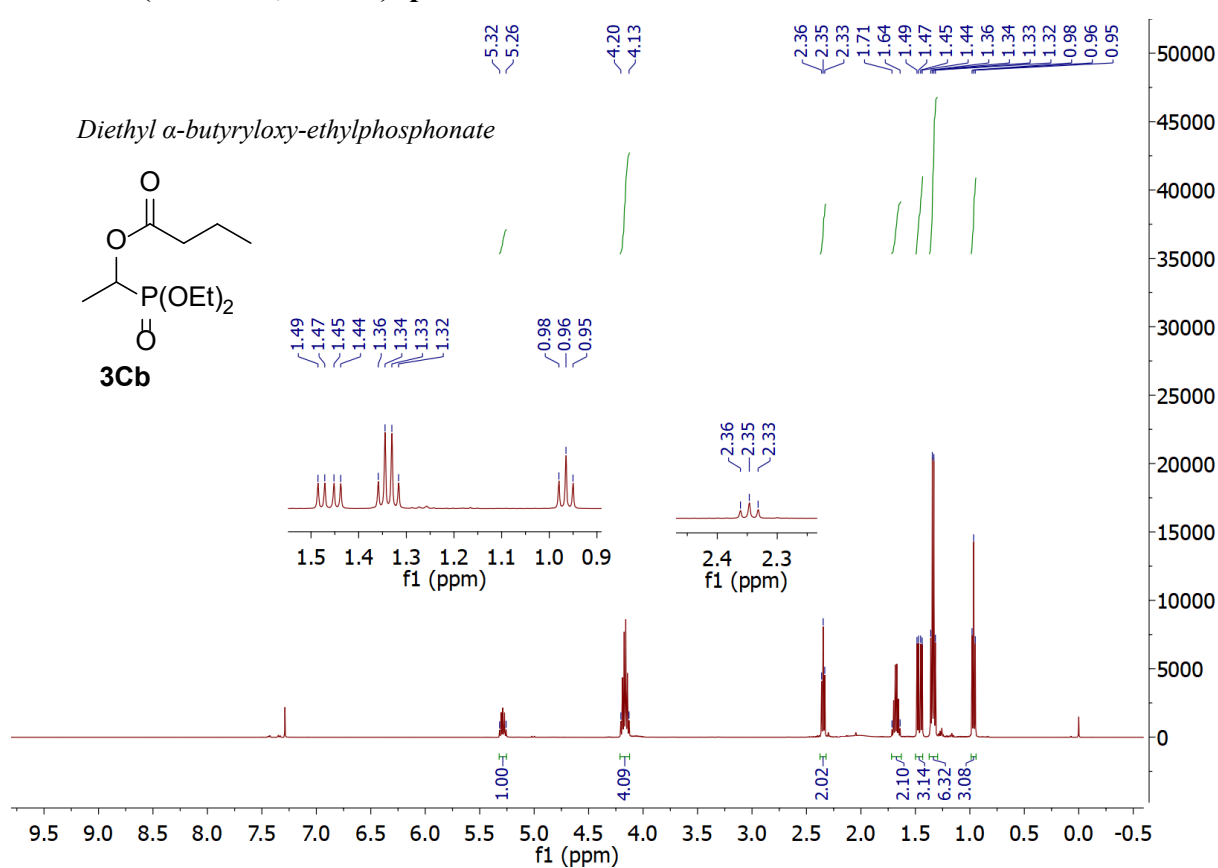

**$^{31}\text{P}$  { $^1\text{H}$ } NMR (202 MHz,  $\text{CDCl}_3$ ) spectra for 3Db**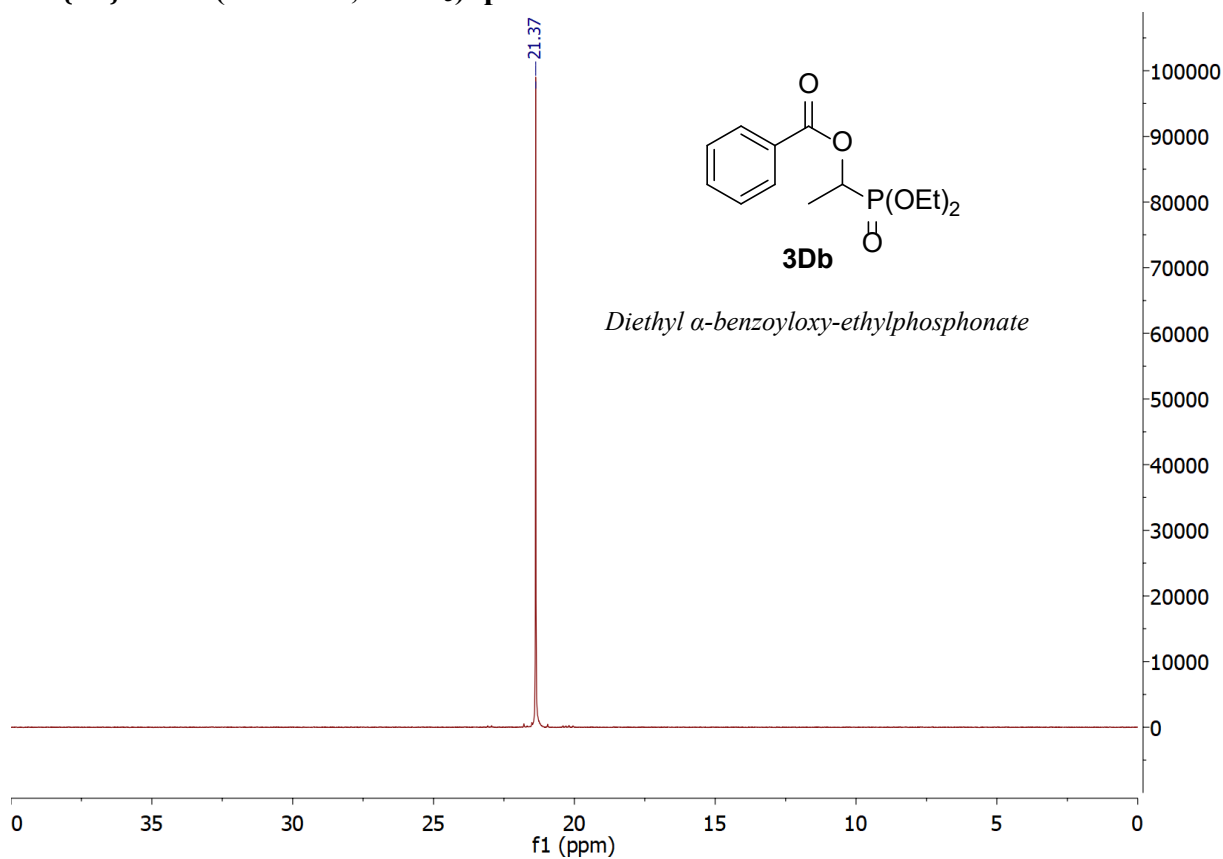 **$^{31}\text{P}$  { $^1\text{H}$ } NMR (202 MHz,  $\text{CDCl}_3$ ) spectra for 3Ac**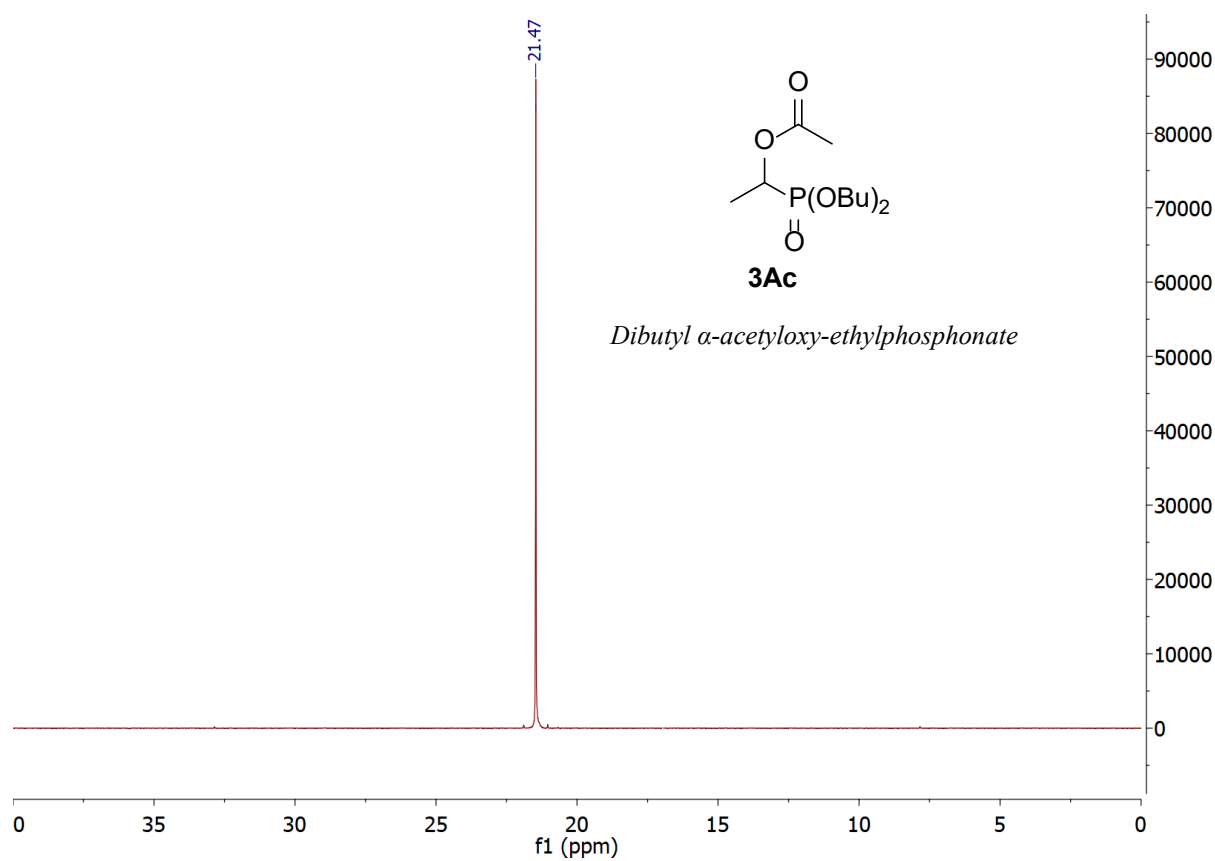

**$^{13}\text{C}$   $\{^1\text{H}\}$  NMR (126 MHz,  $\text{CDCl}_3$ ) spectra for 3Ac**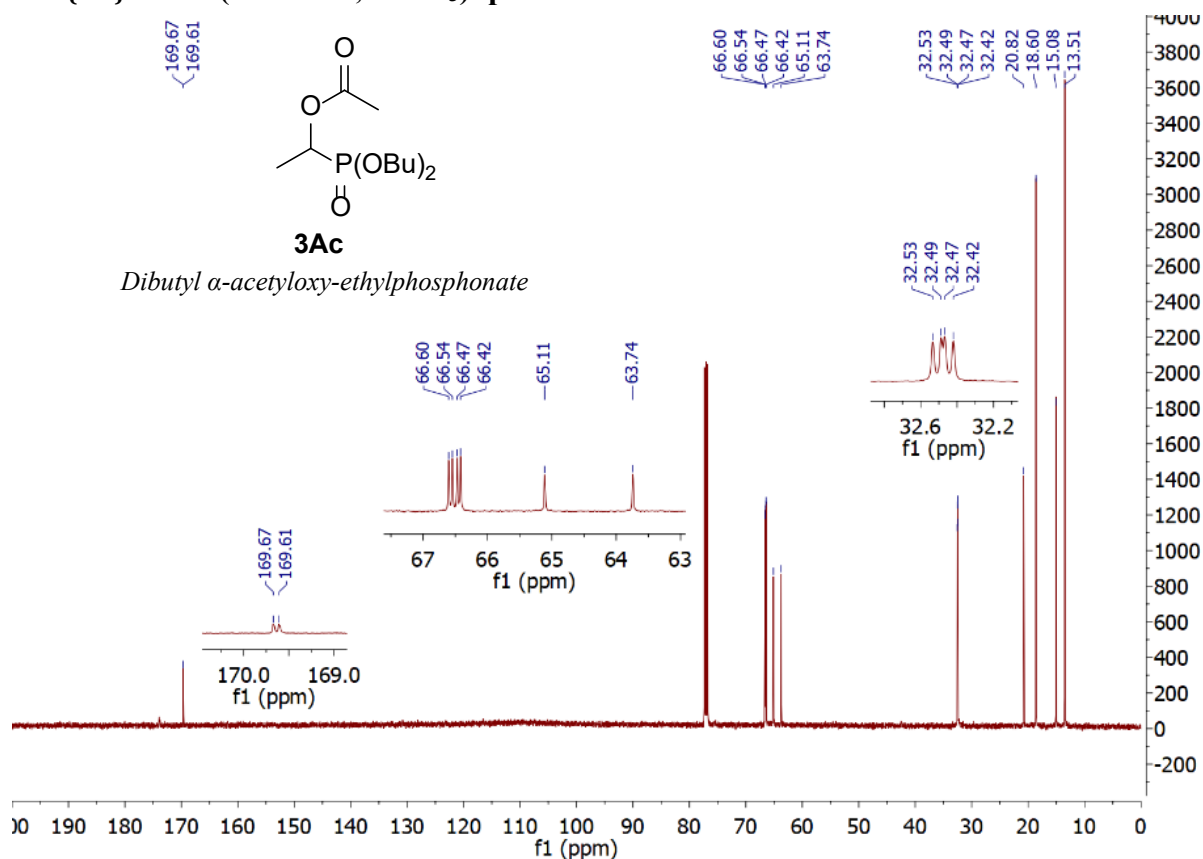 **$^1\text{H}$  NMR (500 MHz,  $\text{CDCl}_3$ ) spectra for 3Ac**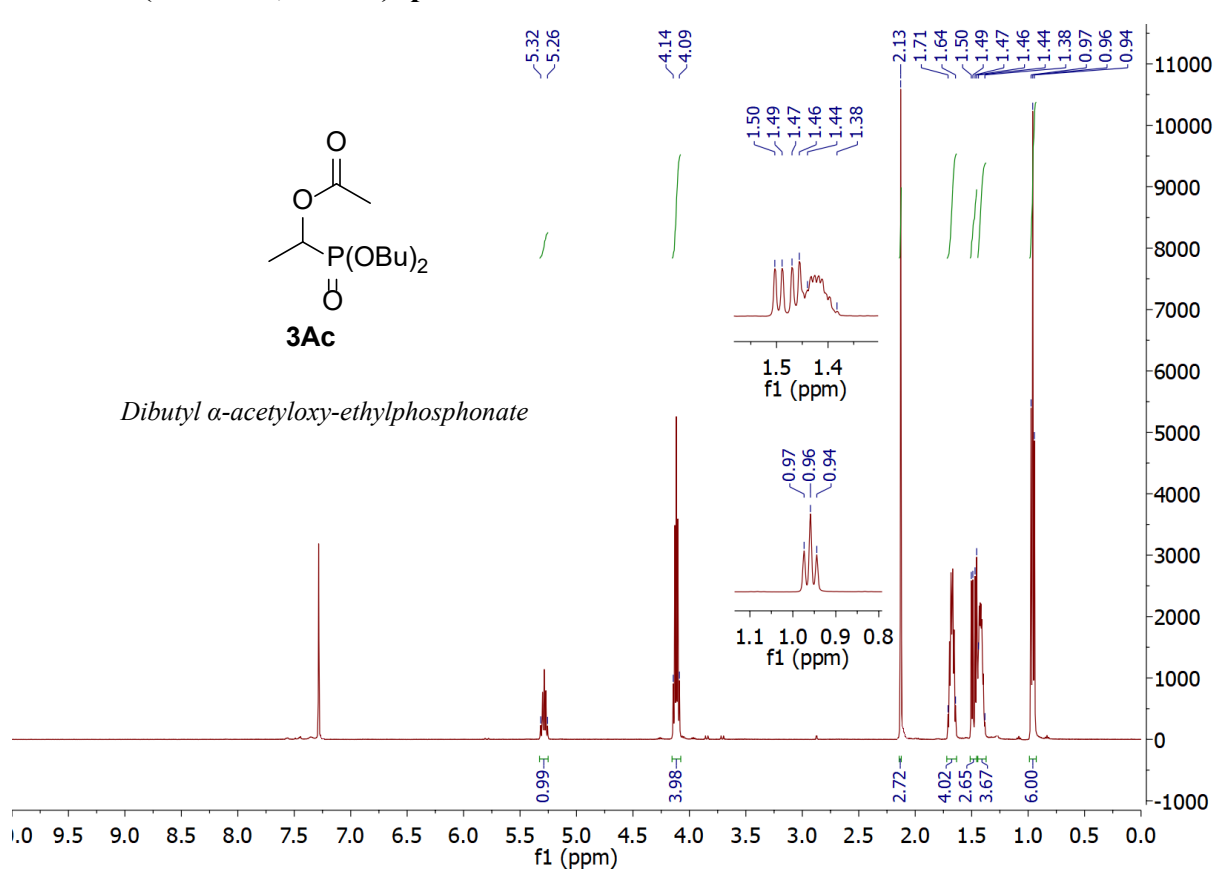

**$^{31}\text{P}$  { $^1\text{H}$ } NMR (202 MHz,  $\text{CDCl}_3$ ) spectra for 3Ad**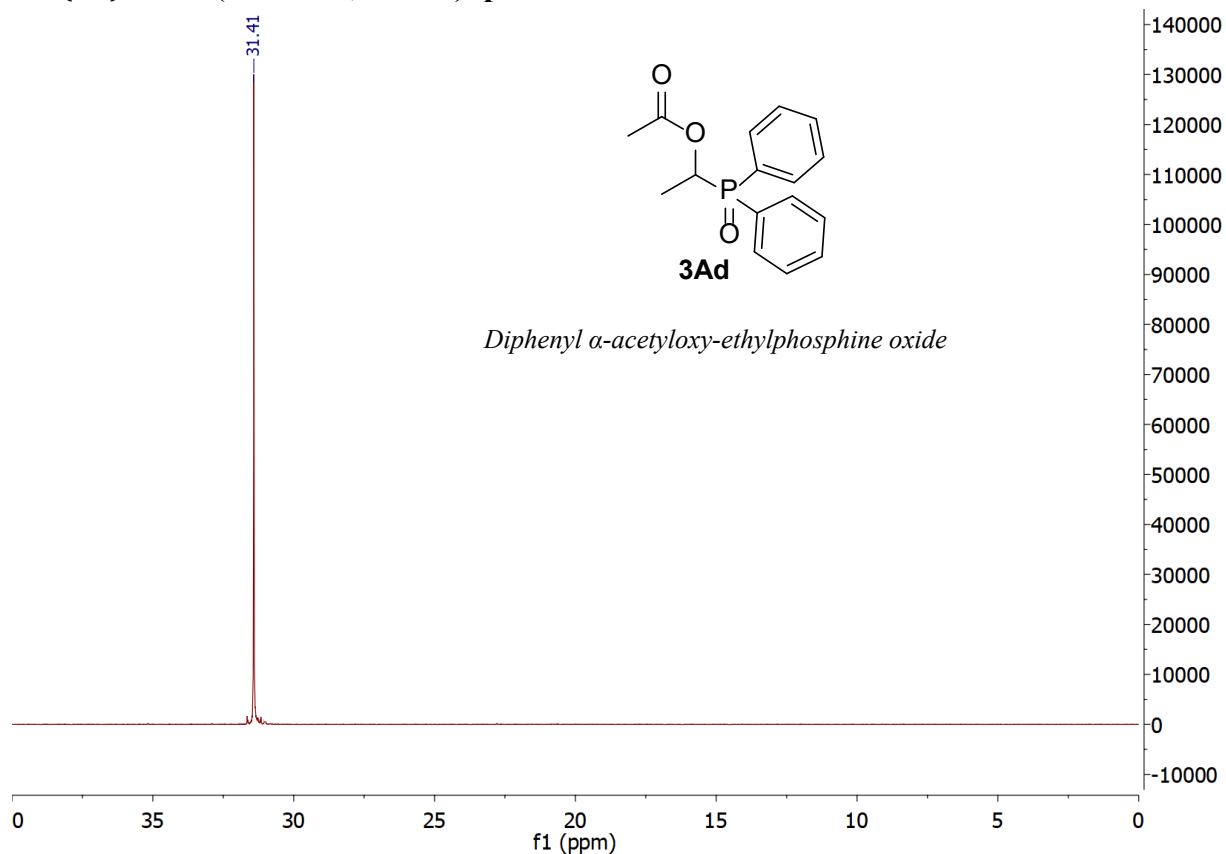 **$^{13}\text{C}$  { $^1\text{H}$ } NMR (126 MHz,  $\text{CDCl}_3$ ) spectra for 3Ad**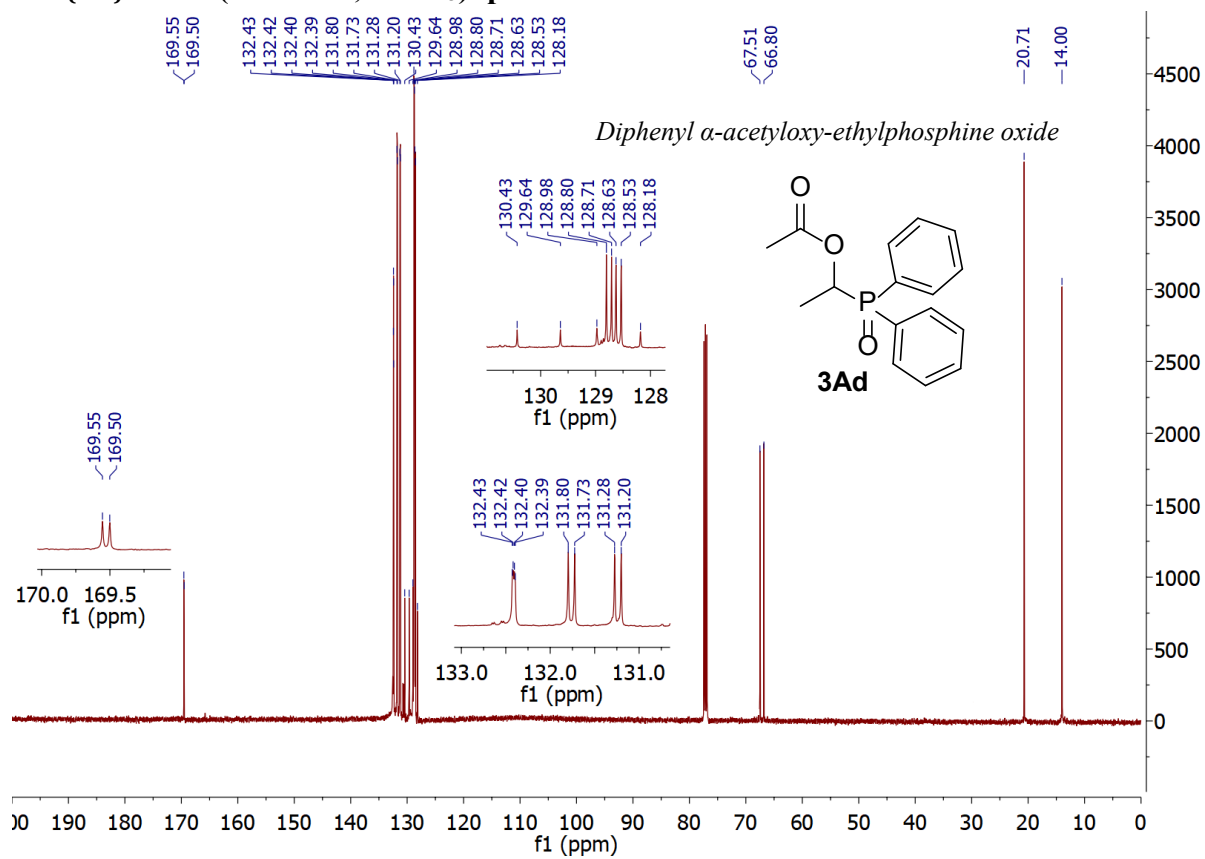



**$^1\text{H}$  NMR (500 MHz,  $\text{CDCl}_3$ ) spectra for 3Ad**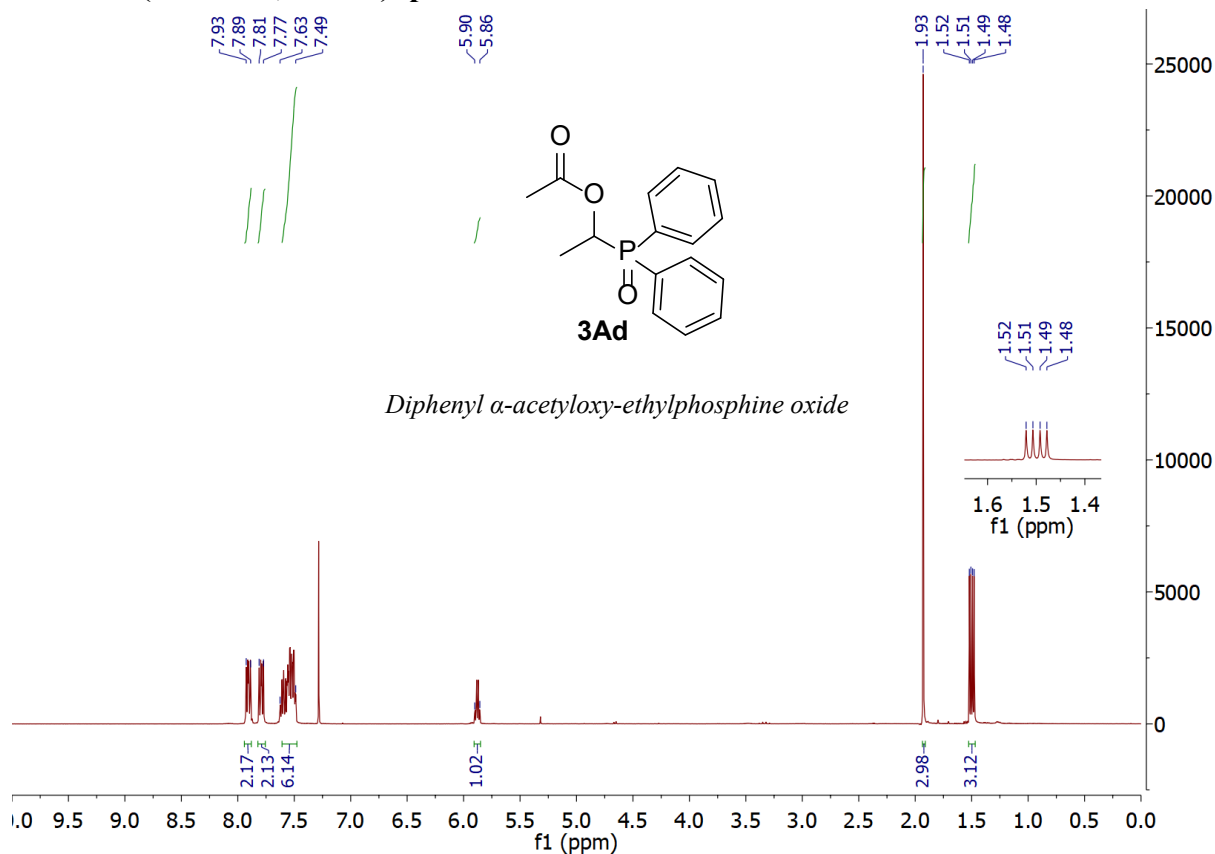 **$^{31}\text{P}$   $\{^1\text{H}\}$  NMR (202 MHz,  $\text{CDCl}_3$ ) spectra for 4Ab**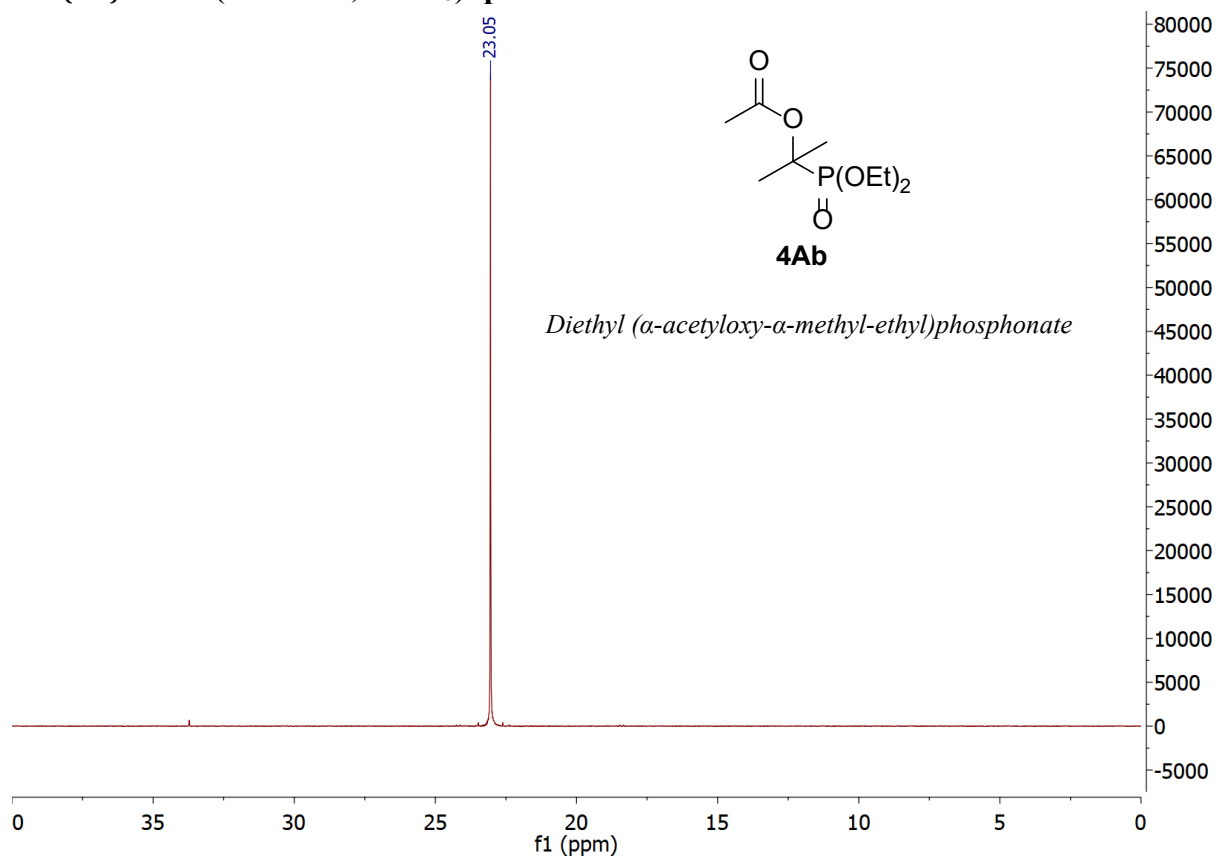

**$^{13}\text{C}$  { $^1\text{H}$ } NMR (126 MHz,  $\text{CDCl}_3$ ) spectra for 4Ab**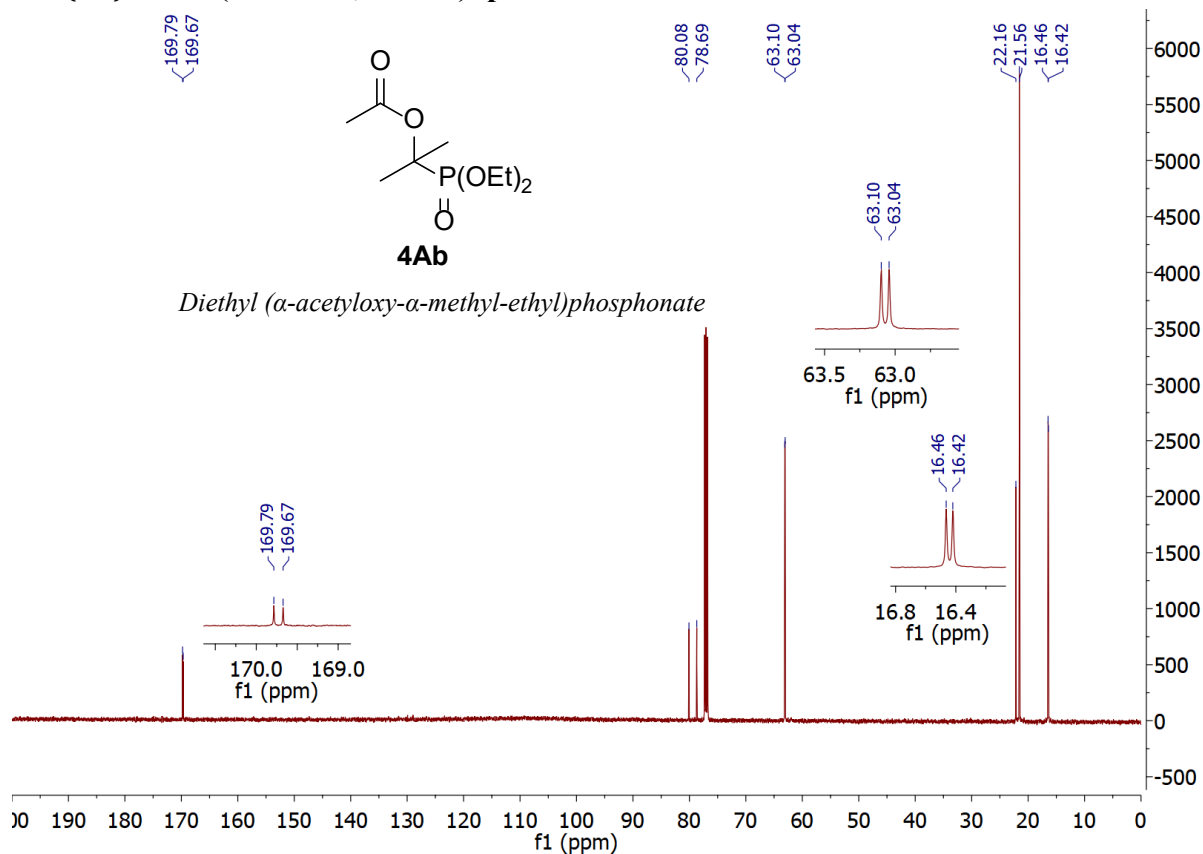 **$^1\text{H}$  NMR (500 MHz,  $\text{CDCl}_3$ ) spectra for 4Ab**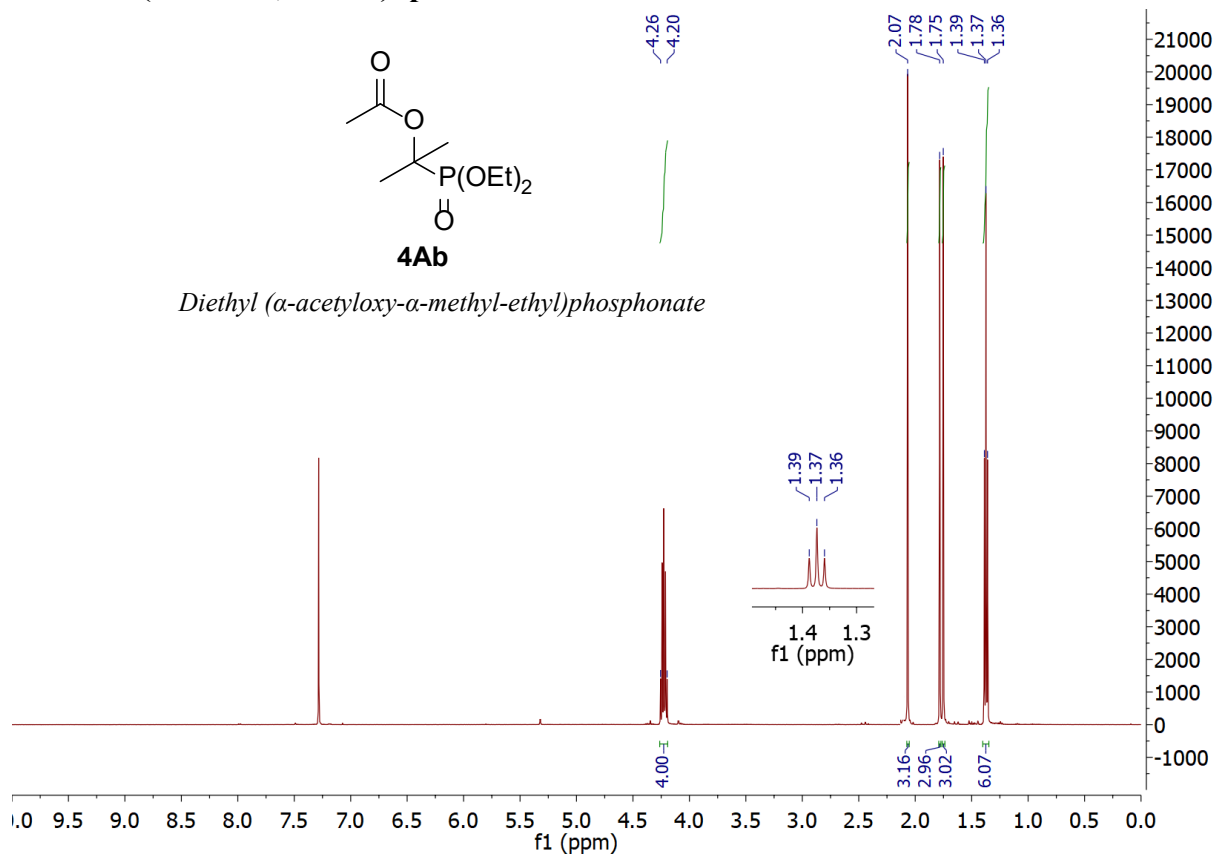

$^{31}\text{P}$   $\{^1\text{H}\}$  NMR (202 MHz,  $\text{CDCl}_3$ ) spectra for 4Bb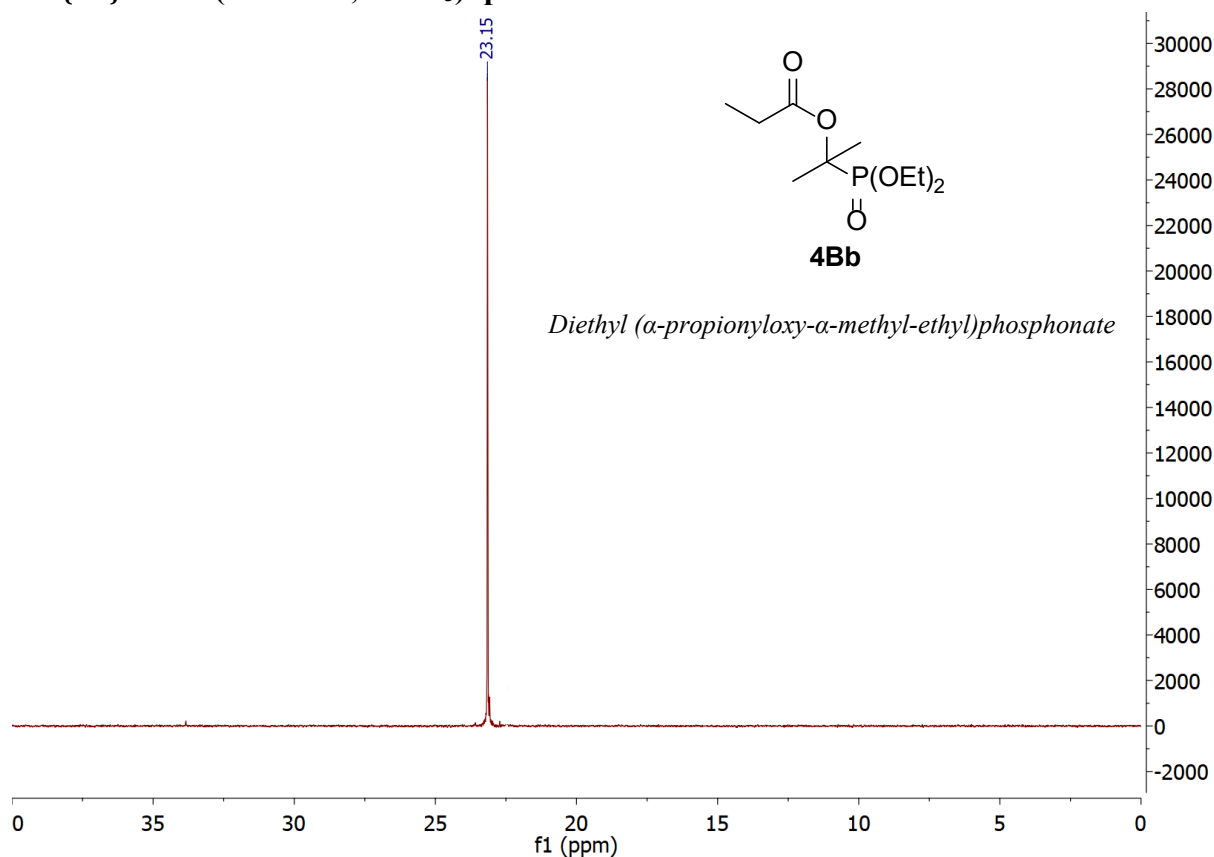 $^{13}\text{C}$   $\{^1\text{H}\}$  NMR (126 MHz,  $\text{CDCl}_3$ ) spectra for 4Bb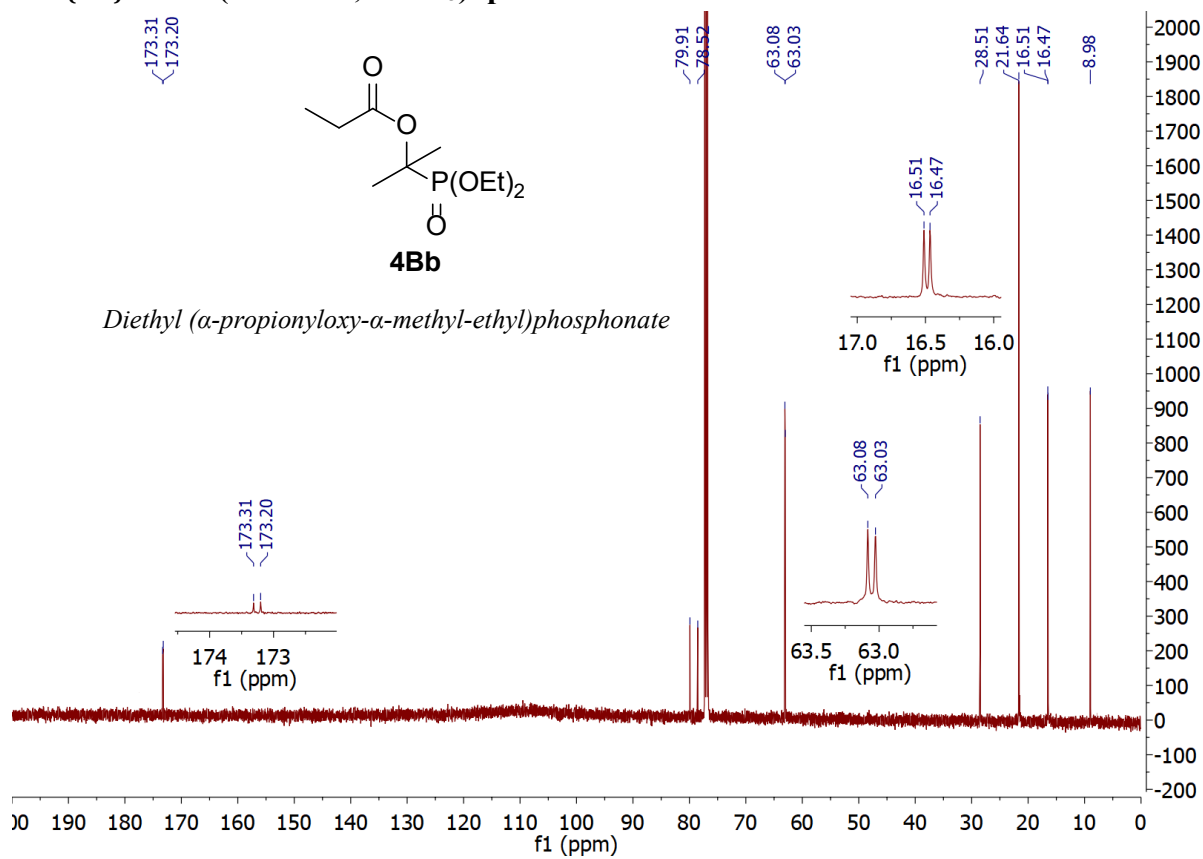

**<sup>1</sup>H NMR (500 MHz, CDCl<sub>3</sub>) spectra for 4bB**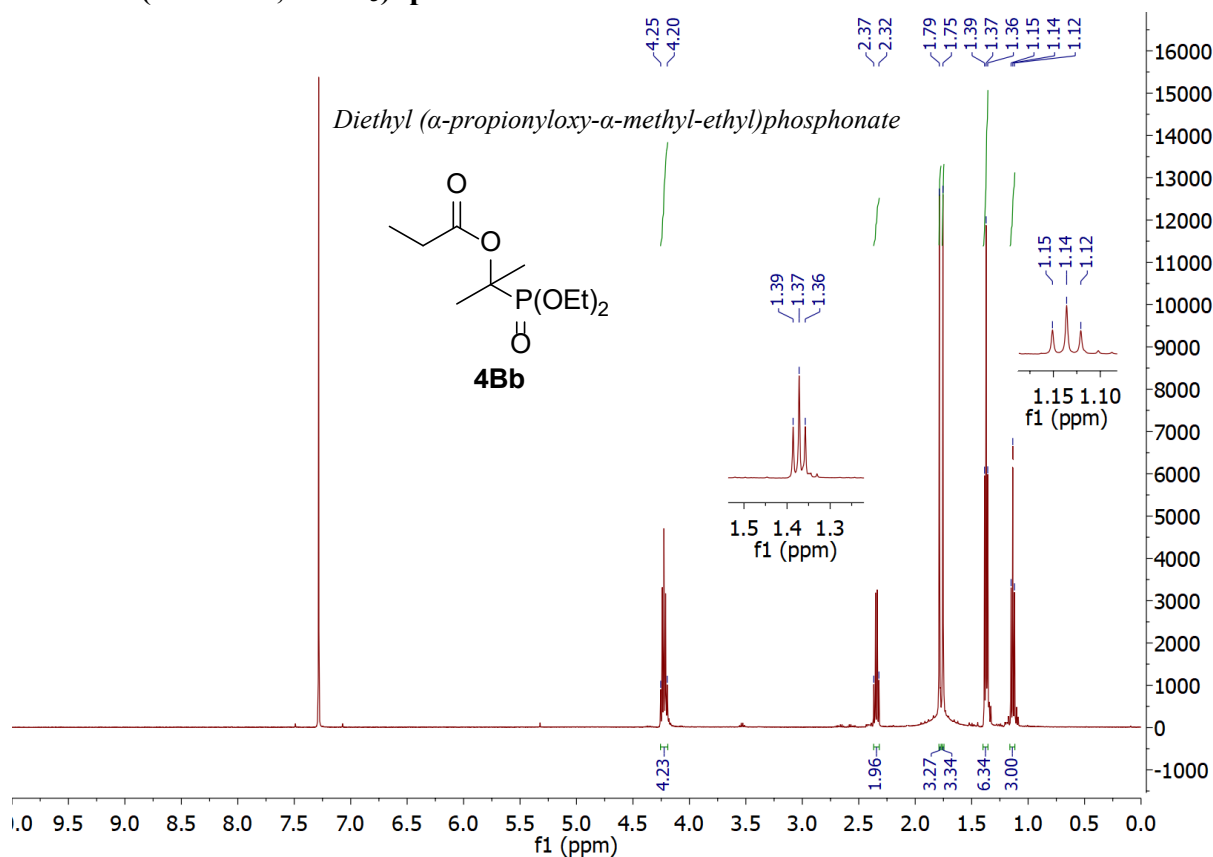**<sup>31</sup>P {<sup>1</sup>H} NMR (202 MHz, CDCl<sub>3</sub>) spectra for 4Cb**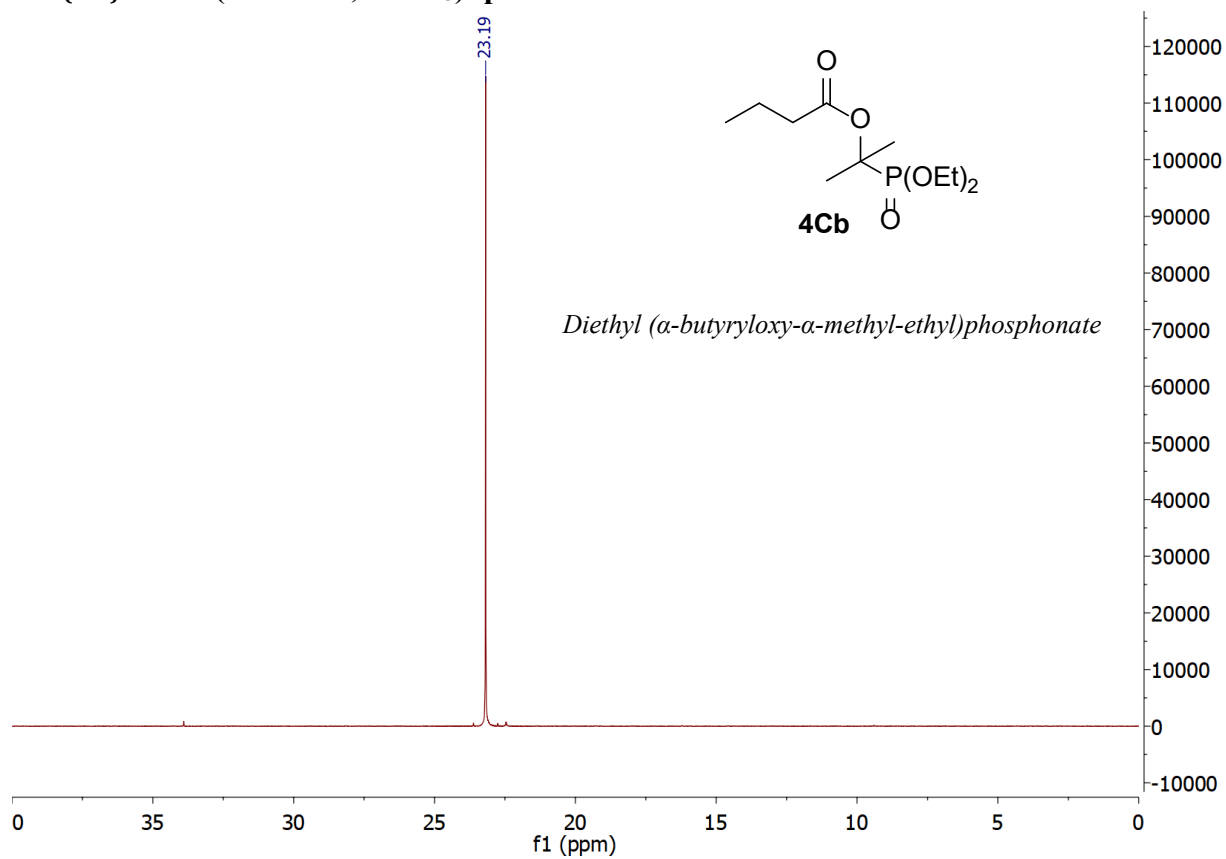

**$^{13}\text{C}$  { $^1\text{H}$ } NMR (126 MHz,  $\text{CDCl}_3$ ) spectra for 4Cb**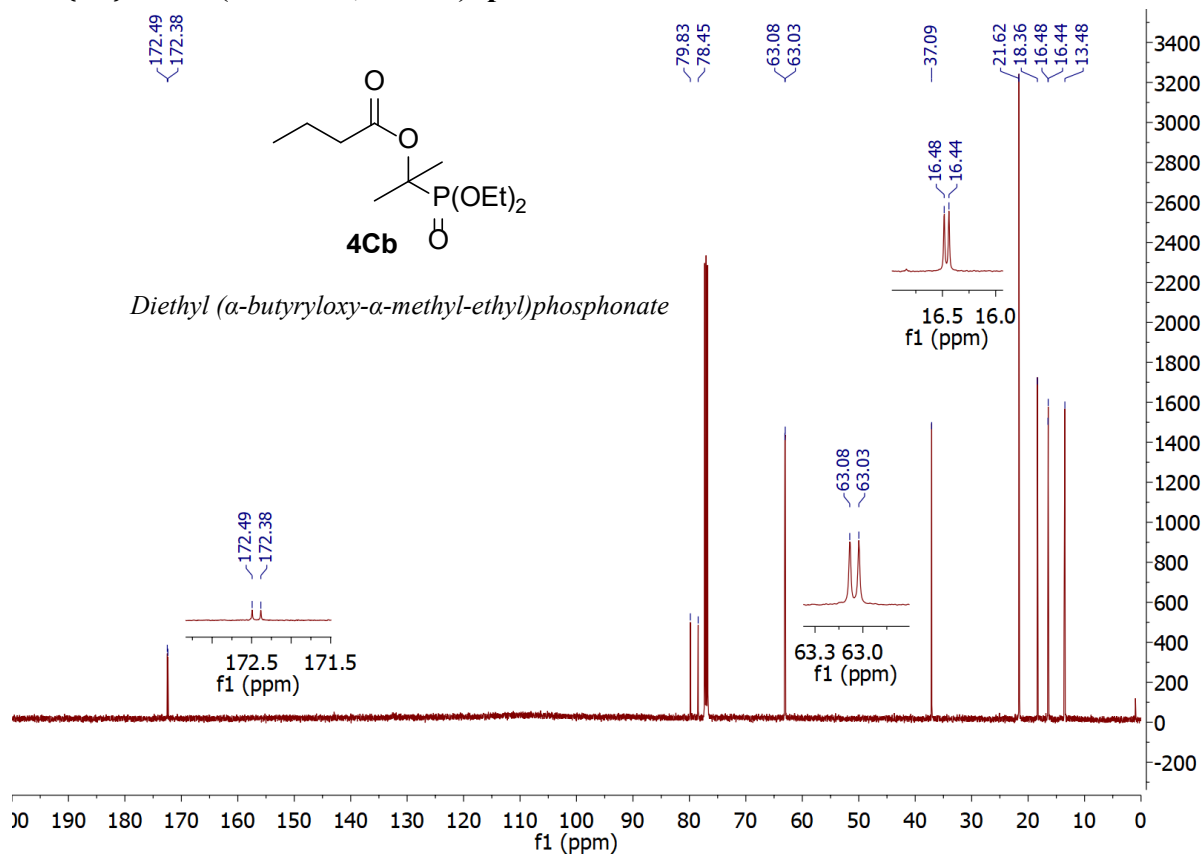 **$^1\text{H}$  NMR (500 MHz,  $\text{CDCl}_3$ ) spectra for 4Cb**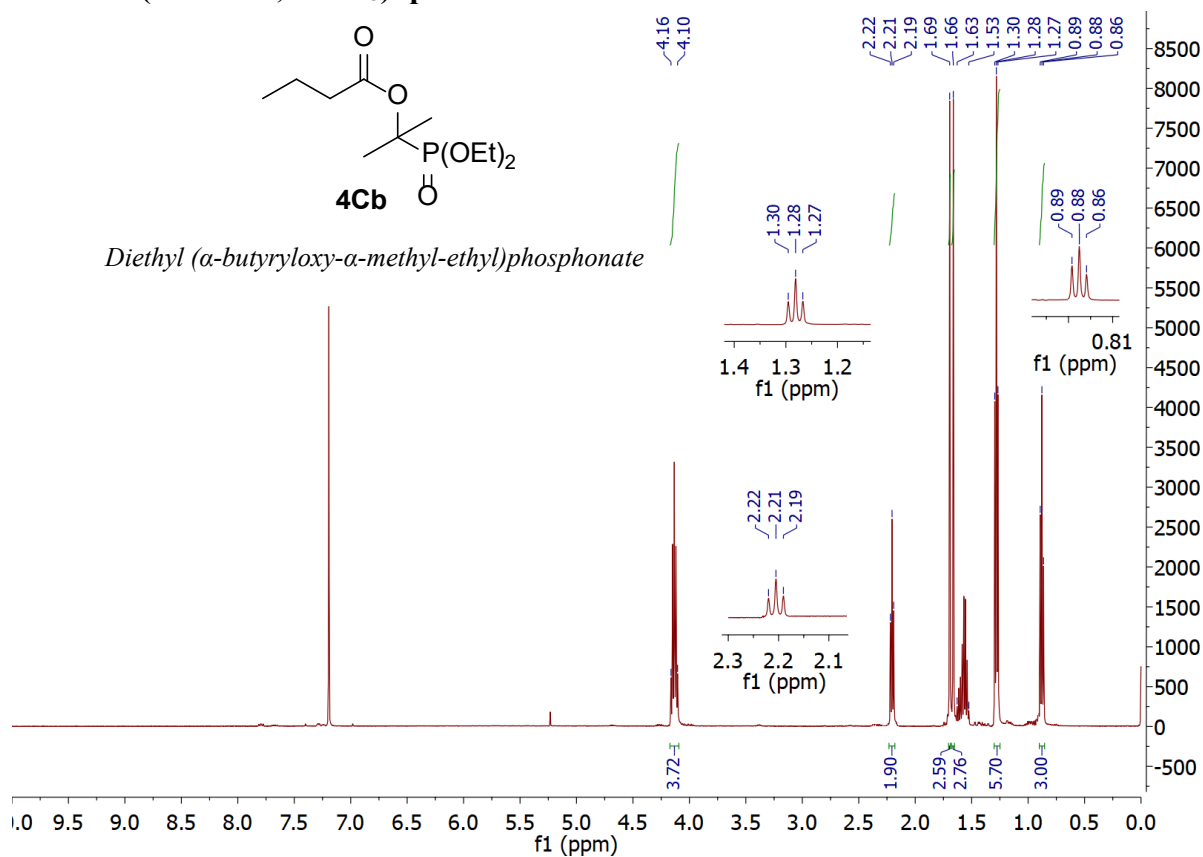

$^{31}\text{P}$   $\{^1\text{H}\}$  NMR (202 MHz,  $\text{CDCl}_3$ ) spectra for 4Ac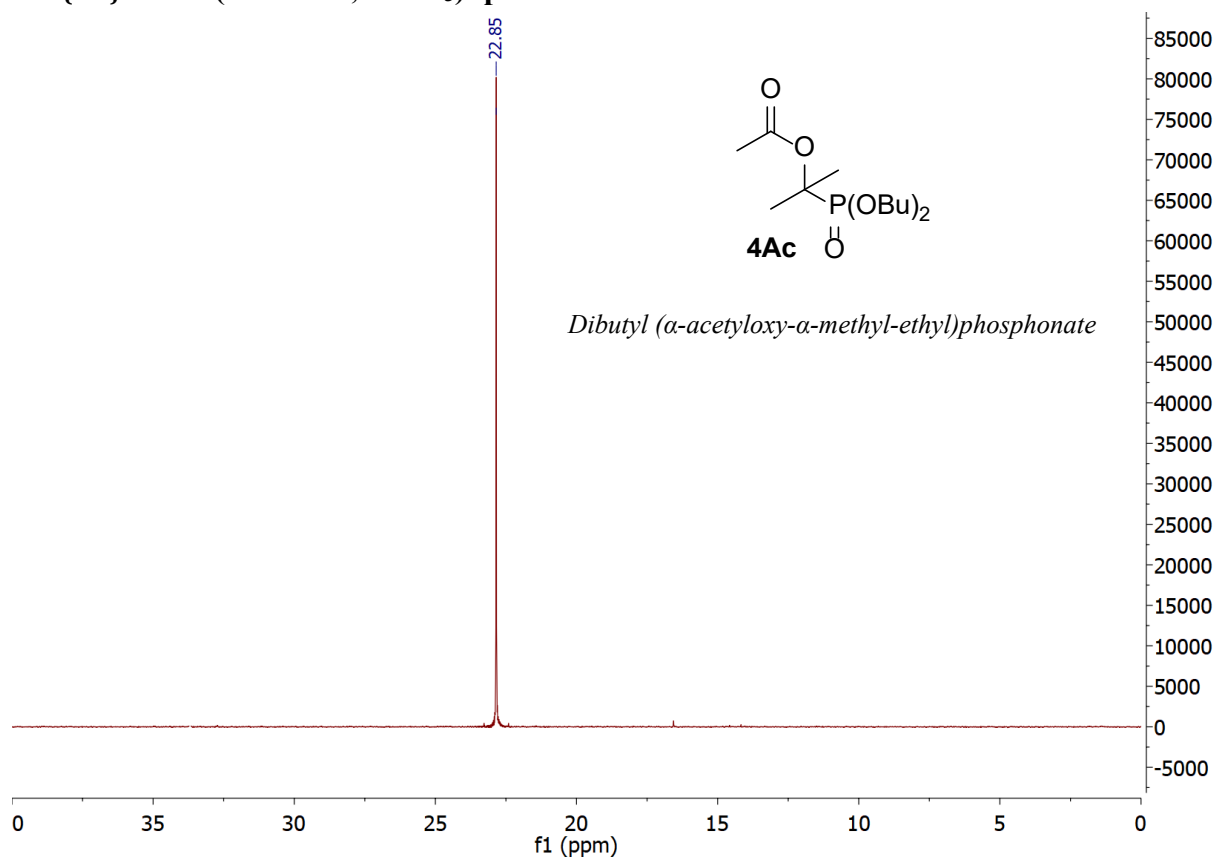 $^{13}\text{C}$   $\{^1\text{H}\}$  NMR (126 MHz,  $\text{CDCl}_3$ ) spectra for 4Ac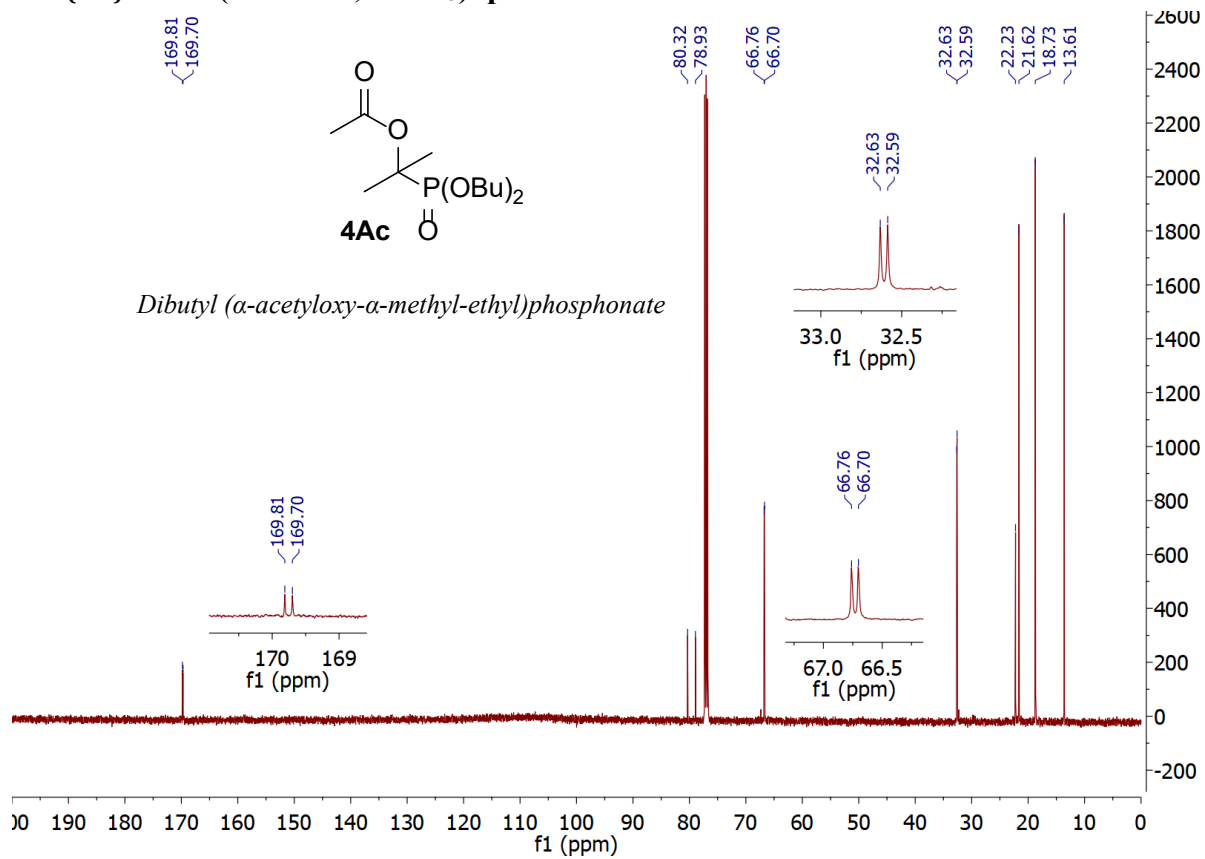

**<sup>1</sup>H NMR (500 MHz, CDCl<sub>3</sub>) spectra for 4Ac**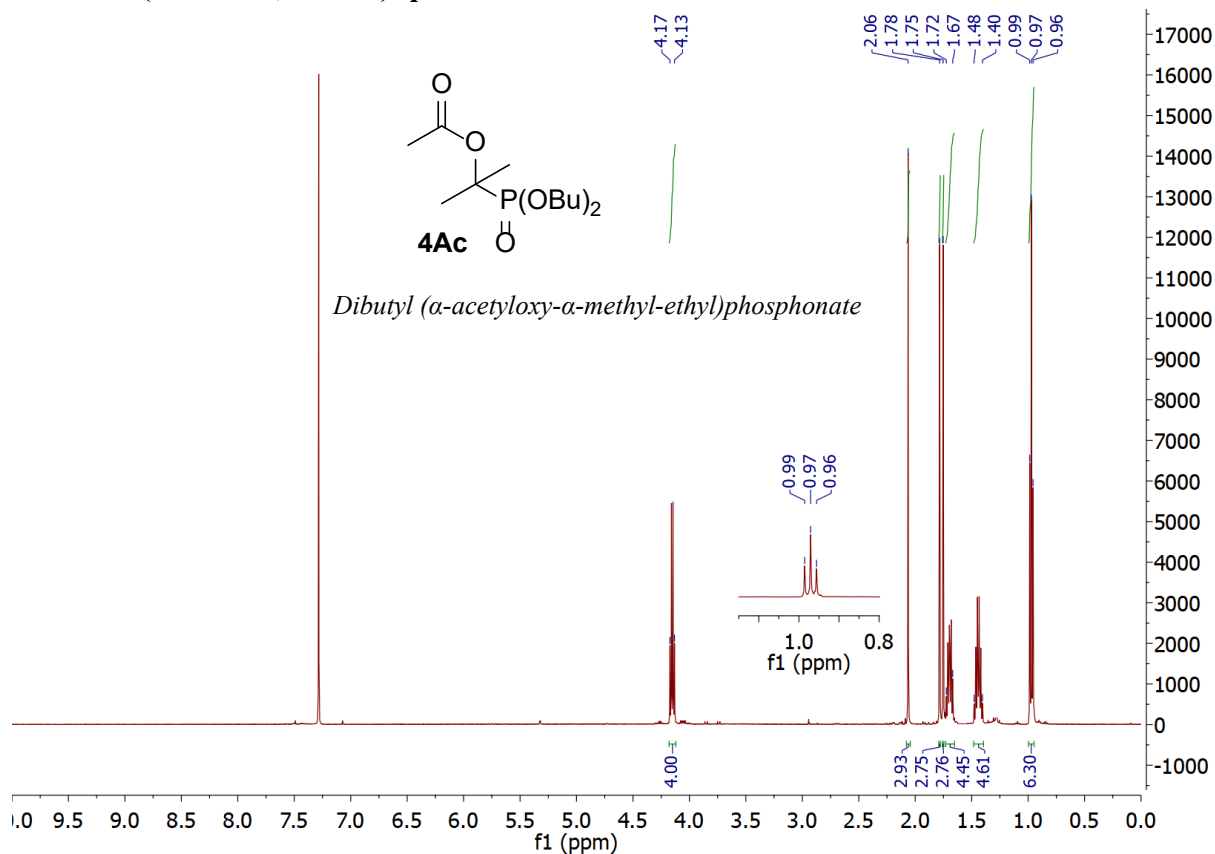**<sup>31</sup>P {<sup>1</sup>H} NMR (202 MHz, CDCl<sub>3</sub>) spectra for 5**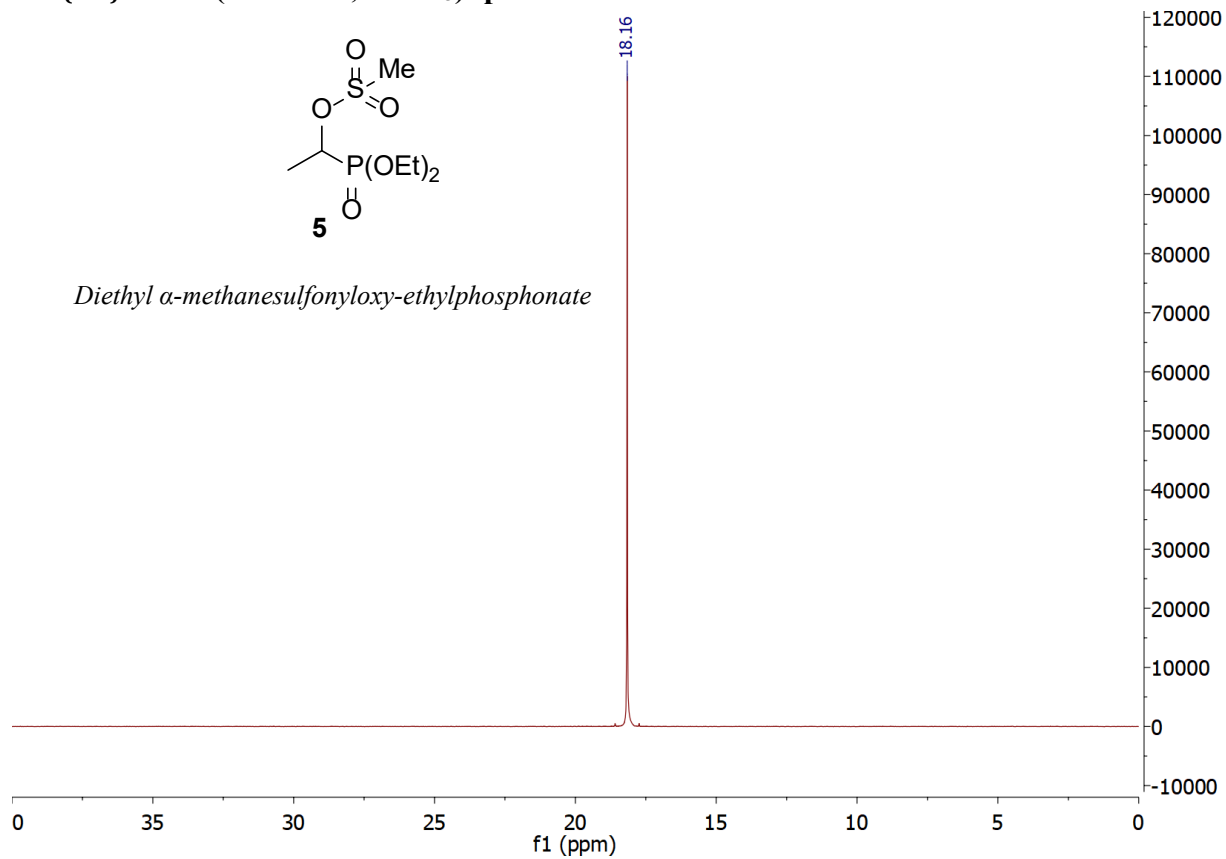

**$^{13}\text{C}$  { $^1\text{H}$ } NMR (126 MHz,  $\text{CDCl}_3$ ) spectra for 5**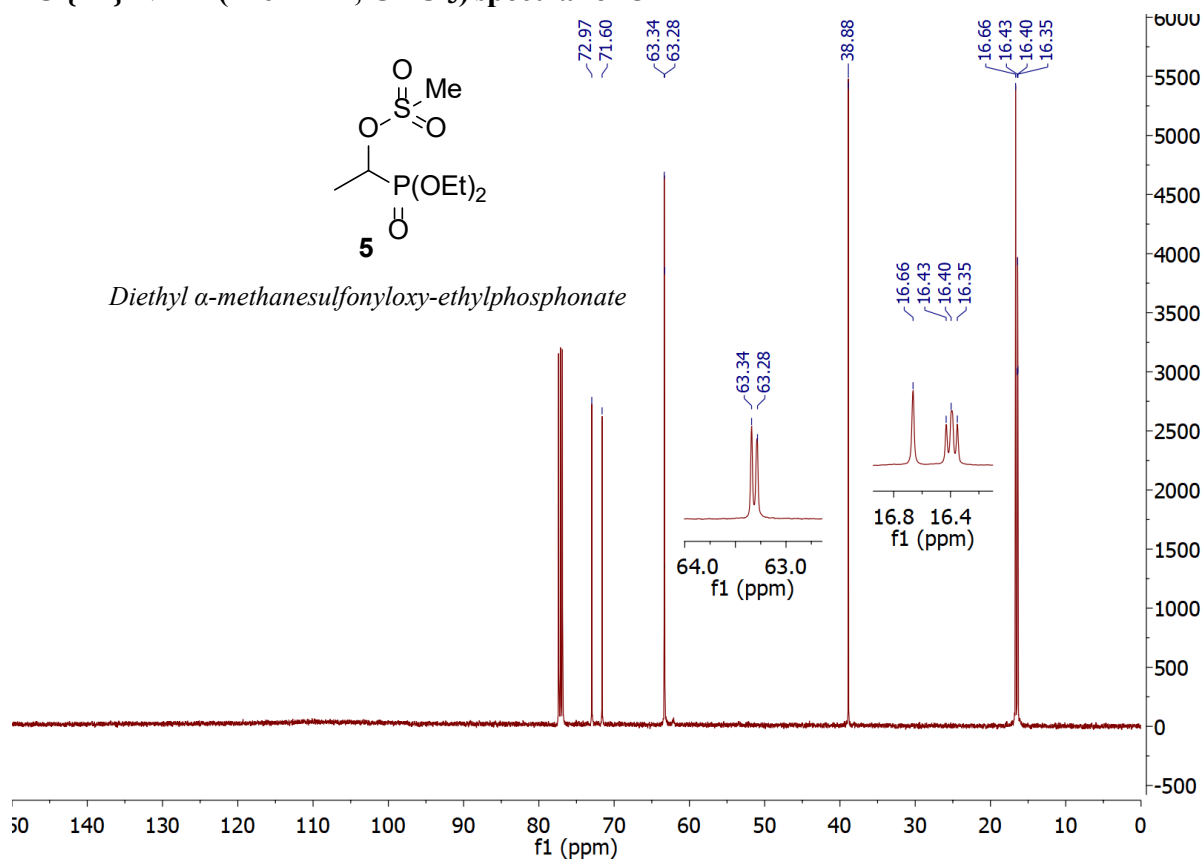 **$^1\text{H}$  NMR (500 MHz,  $\text{CDCl}_3$ ) spectra for 5**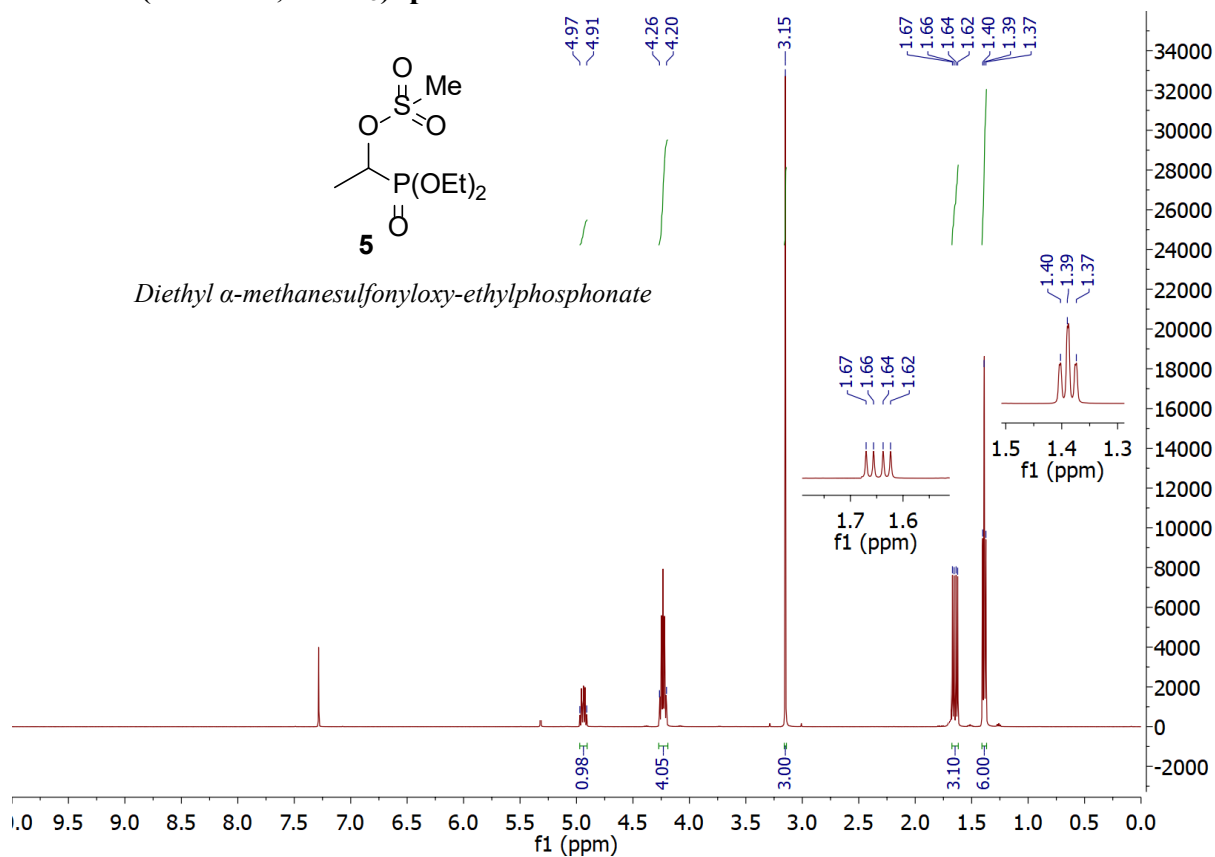



$^{31}\text{P}$   $\{^1\text{H}\}$  NMR (202 MHz,  $\text{CDCl}_3$ ) spectra for 6a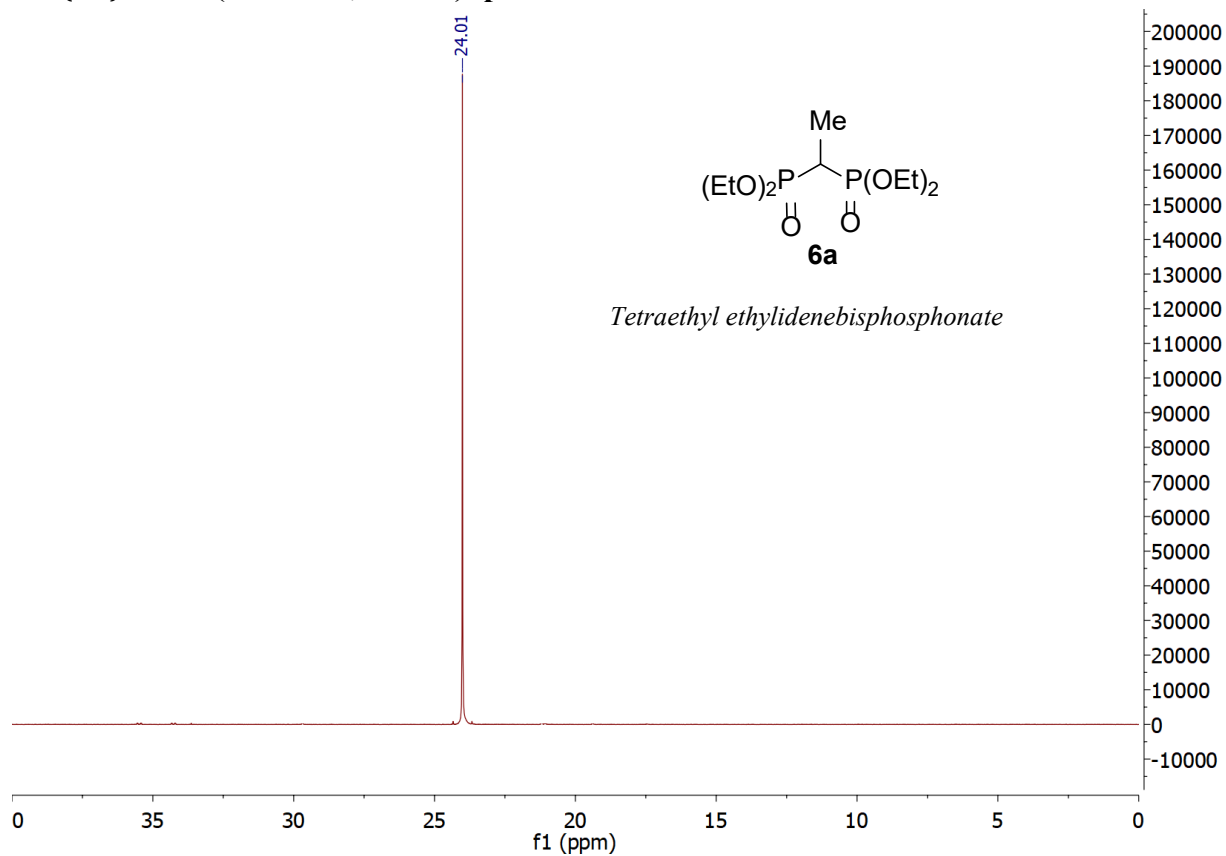 $^{31}\text{P}$   $\{^1\text{H}\}$  NMR (202 MHz,  $\text{CDCl}_3$ ) spectra for 6b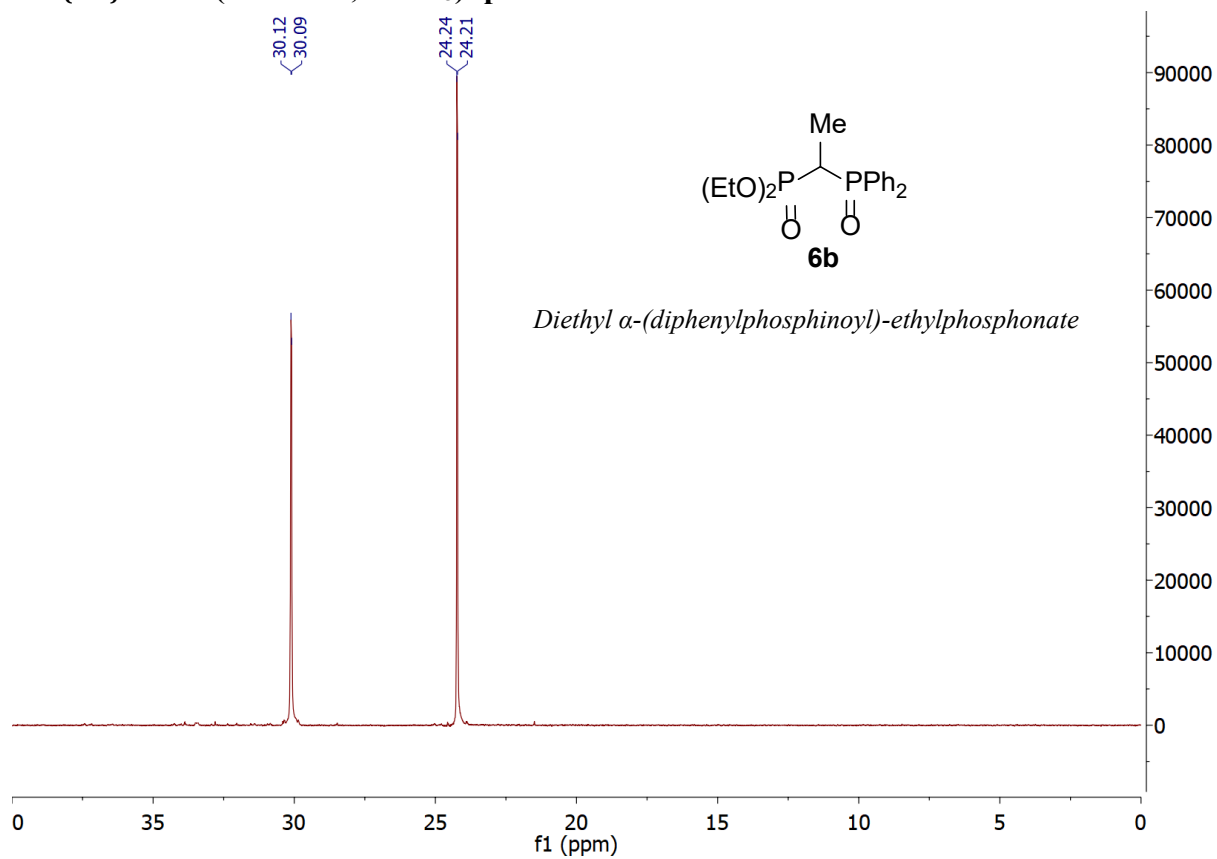

Supplement: s1 [file s1]
